1 *Atypus karschi* Dönitz, 1887 (Araneae: Atypidae): an Asian purse-web spider established in  
2 Pennsylvania, USA

3

4 *Atypus karschi*: Asian spider established in the USA

5

6 Milan Řezáč<sup>1</sup>, Steven Tessler<sup>2</sup>, Petr Heneberg<sup>3</sup>, Ivalú Macarena Ávila Herrera<sup>4</sup>, Nela  
7 Gloriková<sup>1</sup>, Martin Forman<sup>4</sup>, Veronika Řezáčová<sup>1</sup>, Jiří Král<sup>4</sup>

8

9 <sup>1</sup> Crop Research Institute, Drnovská 507, CZ-161 06 Prague 6 – Ruzyně, Czech Republic;  
10 [rezac@vurv.cz](mailto:rezac@vurv.cz), [strver@seznam.cz](mailto:strver@seznam.cz)

11 <sup>2</sup> Tyler Arboretum, 515 Painter Road, Media PA 19063, USA; [tylerspiderwatch@gmail.com](mailto:tylerspiderwatch@gmail.com)

12 <sup>3</sup> Third Faculty of Medicine, Charles University, Ruská 87, CZ-100 00 Prague, Czech  
13 Republic; [petr.heneberg@Lf3.cuni.cz](mailto:petr.heneberg@Lf3.cuni.cz)

14 <sup>4</sup> Laboratory of Arachnid Cytogenetics, Department of Genetics and Microbiology, Faculty of  
15 Science, Charles University, Viničná 5, 128 44 Prague, Czech Republic; [avilai@natur.cuni.cz](mailto:avilai@natur.cuni.cz),  
16 [spider@natur.cuni.cz](mailto:spider@natur.cuni.cz), [formivelkejpan@seznam.cz](mailto:formivelkejpan@seznam.cz)

17

19 **Abstract**

20 The Mygalomorph spiders of the family Atypidae are among the most archaic spiders. The  
21 genus *Atypus* Latreille, 1804 occurs in Eurasia and northern Africa, with a single enigmatic  
22 species, *Atypus snetsingeri* Sarno, 1973, restricted to a small area in southeastern  
23 Pennsylvania in Eastern USA. This study was undertaken to learn more about genetics of that  
24 species, its habitat requirements and natural history. A close relationship to European species  
25 could be assumed based on *A. snetsingeri*'s occurrence on the eastern coast of the USA,  
26 however molecular markers (CO1 sequences) confirmed that *A. snetsingeri* is identical with  
27 *Atypus karschi* Dönitz, 1887 native to East Asia; it is an introduced species. The specific  
28 epithet *snetsingeri* is therefore relegated to a junior synonym of *A. karschi*. The karyotype of  
29 *A. karschi* has 42 chromosomes in females and 41 in males (X0 sex chromosome system).  
30 Chromosomes were metacentric except for one pair, which exhibited submetacentric  
31 morphology. In Pennsylvania the above-ground webs are usually vertical and attached to the  
32 base of bushes, trees, or walls, although some webs are oriented horizontally near the ground.  
33 It was found in a variety of habitats from forests to suburban shrubbery, and over a wide  
34 range of soil humidity and physical parameters. Prey include millipedes, snails, woodlice,  
35 carabid beetles and earthworms. The number of juveniles in excavated female webs ranged  
36 from 70 to 201. *Atypus karschi* is the first known case of an introduced purse-web spider. It is  
37 rarely noticed but well-established within its range in southeastern Pennsylvania.

38

39

40 Keywords: CO1, chromosome, mygalomorph, nonnative species, nucleolus organizer region

41

## 42 **Introduction**

43

44 Mygalomorph spiders of the family Atypidae are among the earliest divergent groups of  
45 spiders (1). They dig a burrow and construct a ‘purse-web’, usually in the form of a closed  
46 tube, that occupies the burrow and extends above the ground horizontally or vertically for  
47 prey capture. The webs are well-camouflaged with soil particles and plant debris and potential  
48 prey are sensed when they walk on the surface of the tube. The spider impales the prey  
49 through the silk with its long fangs and injects paralytic venom. It then makes a slit in the tube  
50 large enough to drag the prey inside, repairs the tear with new silk, and feeds on the prey (2–  
51 5). Atypid spiders spend their entire lifetime within their burrow in the silken web, 8–10 years  
52 for some females, and enlarge the burrow as they grow (6–8). Males abandon their burrows  
53 when they reach maturity and wander in search of females, and then mate within the female's  
54 web. Egg-laying occurs within the maternal web and fully capable spiderlings emerge later. In  
55 contrast to most Mygalomorphs, atypid spiderlings utilize silk for aerial dispersal before  
56 establishing their first web (9,10). This ability may have allowed some species of atypids to  
57 colonize new areas, including those that were uninhabitable during the last glacial period  
58 (e.g., northern Europe, (11)).

59

60 There are currently three genera and 54 valid species of Atypidae (12). The genus *Atypus*  
61 Latreille, 1804 (34 species from Europe, Asia, North Africa and North America), spins an  
62 above-ground web that is tubular and typically lays horizontally and parallel to the soil  
63 surface. In *Sphodros* Walckenaer, 1835 (seven species from eastern North America) the  
64 above-ground web is tubular and usually attached vertically to trees and other vegetation. In  
65 the genus *Calommata* Lucas, 1837 (13 species from Africa and Asia) the above-ground web is  
66 a flat circular pouch set on the soil surface (13).

67

68 The center of diversity of the genus *Atypus*, based on the number of species, is in southeastern  
69 Asia and at least three species live in the western Palearctic. Despite the number and  
70 widespread distribution of *Atypus* species, they are secretive animals, and little is known  
71 about their habitat requirements, natural history, and genetic variation. In central Europe,  
72 particular *Atypus* species prefer sites with a microclimate regime resembling the climate of the  
73 glacial refuges from where they colonized the region (14). The species that live on open  
74 steppe habitats require soils rich in calcium that maintain a favorable air humidity in spider  
75 burrows. The species that do not require calcic soils occur only in habitats sheltered by woody

76 vegetation, and their webs are hidden in detritus (15). As such, the European *Atypus* spiders  
77 are indicators of stable relic habitats and considered optimal flagship species in the  
78 conservation of disappearing relic xerothermic habitats (8).

79

80 Currently there are 16 Atypidae species with recorded DNA sequence data, eleven of which  
81 represent the genus *Atypus* (16). In contrast, only four species of Atypids, also in the genus  
82 *Atypus*, have been studied for their chromosomal constitution: *Atypus affinis* Eichwald, 1830;  
83 *Atypus karschi* Dönitz, 1887; *Atypus muralis* Bertkau, 1890; and *Atypus piceus*, Sulzer, 1776.  
84 The reported diploid number ranges from 14 to 44, and sex chromosome systems XY, X0,  
85 and X<sub>1</sub>X<sub>2</sub>0 have been described (17–19). There are no data on other chromosome features,  
86 such as constitutive heterochromatin or nucleolus organizing regions (NORs). Those  
87 chromosome markers have been sporadically examined in Mygalomorphae (17,20).

88

89 This study looked at the genetics and habitat requirements of the lone species of *Atypus* found  
90 in North America, *Atypus snetsingeri* Sarno, 1973 (21). This spider appears to be restricted to  
91 a small geographic area near Philadelphia, Pennsylvania in eastern USA (22). It is  
92 morphologically similar to *Atypus karschi* of Asia (7,23,24) hypothesized that it was probably  
93 introduced to North America by human activity. To help resolve its relationship with other  
94 Atypids, the karyotype and genetic barcode (CO1) were developed for *Atypus snetsingeri* to  
95 compare with other *Atypus* species, along with observations on habitat associations and  
96 natural history.

97

## 98 **Material and Methods**

99

### 100 *Study locations*

101

102 In November 2013 we visited eight sites in Delaware County, Pennsylvania, that were known  
103 to have *Atypus snetsingeri* populations (Tessler, personal observations). The sites ranged from  
104 semi-urban areas near the Type locality to wooded county parks along riparian corridors  
105 where purse-webs were common. The primary site used for detailed web observations,  
106 specimen excavation and collection was a fallow field surrounded by forest at the Tyler  
107 Arboretum (Media, PA). That field was mowed annually to control invasive plants and  
108 facilitated access to the webs.

109

110 *Habitat and natural history*

111

112 At each site, we assessed the primary vegetation cover and soil type. The land orientation of  
113 the web location was measured using a compass and the slope angles using an optical reading  
114 clinometer to the nearest 0.5°. Soil penetration resistance was measured as described by Srba  
115 & Heneberg (25), where higher values reflect mechanical impedance for burrowing.

116

117 The range of web sizes (tube diameter) was visually assessed in the field and prey were noted  
118 by identifying remnants of invertebrates found attached to webs. The complete webs of 18  
119 adult females were excavated on 5–9 November 2013. The length of the purse-webs were  
120 measured, distinguishing the below-ground and above-ground sections by coloration and  
121 attached soil. The size of the females was characterized by measuring the length of the  
122 carapace along the midline. When spiderlings were present, their number was counted.  
123 Voucher specimens from this study were deposited at the Crop Research Institute, Prague,  
124 Czechia.

125

126 *Statistical analysis*

127

128 We used Pearson's correlation test to analyze the correlation between carapace size and tube  
129 parameters (depth of the burrow, length of the capturing tube, and total length of the whole  
130 web) and to analyze the correlation between individual tube parameters. We evaluated the  
131 correlation between female size and number of offspring using the Spearman's correlation  
132 test. The difference in body size between females with offspring and females without  
133 offspring was analyzed using the Welch two sample *t*-test. We tested the two variances in the  
134 subterranean and surface part of the tube by F-test. Normality was tested by Shapiro-Wilk  
135 normality test. Data were analyzed in the statistical software R 3.6.2 (26). The means are  
136 given with  $\pm$  the standard error of the mean as a measure of sampling distribution.

137

138 *Karyotype analysis*

139

140 Chromosome preparations were obtained from gonads of one immature male (testes present)  
141 and one mature female (ovary present). We followed the spreading technique described for  
142 mygalomorphs by Král et al. (20) except for fixation time (10 and 20 min). The standard  
143 preparations were stained by 5% Giemsa solution in Sørensen phosphate buffer for 25 min.

144 The evaluation of the karyotype was based on five mitotic metaphases. The chromosome  
145 measurements were carried out using ImageJ software (27). The relative chromosome lengths  
146 were calculated in each specimen independently as a percentage of the total chromosome  
147 length (TCL) of the haploid set, including sex chromosome. Chromosome morphology was  
148 classified according to Levan et al. (28).

149

150 Our study also includes detection of constitutive heterochromatin and nucleolus organizing  
151 regions. Male mitotic plates were used to visualize these markers. Constitutive  
152 heterochromatin was detected by C-banding following Král et al. (29). Preparations were  
153 stained by 5% Giemsa solution in Sørensen phosphate buffer for 75 min. NORs were  
154 visualized using fluorescence in situ hybridization (FISH) with a biotin-labeled probe for 18S  
155 rDNA sequences. The probe was obtained from *Dysdera erythrina* Walckenaer, 1802  
156 (Dysderidae). FISH, probe detection by streptavidin-Cy3 and signal amplification was  
157 performed as described by Forman et al. (30).

158

#### 159 *DNA extraction, amplification and sequencing*

160

161 We isolated the DNA from legs of three *A. snetsingeri* individuals. We washed the ethanol-  
162 fixed legs twice for 15 min using 1 ml of 10 mM Tris-HCl (pH 7.5) with 5 mM EDTA.  
163 Subsequently, we extracted the DNA using a NucleoSpin Tissue XS kit (Macherey-Nagel,  
164 Düren, Germany) according to the manufacturer's instructions. We then amplified the DNA  
165 using primers targeting nuclear (ITS2) and mitochondrial (CO1) loci using the following  
166 polymerase chain reaction mix: 10 mM Tris-HCl (pH 8.8), 50 mM KCl, 1.5 mM MgCl<sub>2</sub>, 0.1%  
167 Triton X-100, 0.2 mM dNTP (each), 1 μM forward primer, 1 μM reverse primer, 0.5 U of Taq  
168 DNA polymerase (Top-Bio, Prague, Czech Republic), and 300 ng of extracted genomic DNA.  
169 The total reaction volume was 25 μl. To amplify the ITS2 locus, we used the primers  
170 ApicITS2FW2 (5'-CGATGAAGAACGCAGCCAGCTGCGAG-3'; (31)) and RITS (5'-  
171 TCCTCCGCTTATTGATATGC-3'; (32)). To amplify the CO1 locus, we used the primers  
172 LCO1490 (5'-GGTCAACAAATCATAAAGATATTGG-3'; ((33)) and C1-N-2194 (5'-  
173 CTTCTGGATGACCAAAAATC-3'; (34)). We performed the reaction using an Eppendorf  
174 Mastercycler Pro thermal cycler (Eppendorf, Hamburg, Germany) for 36 cycles with 15-s  
175 denaturation at 94 °C, 2-min annealing at 43–57 °C, followed by a 1–3-min extension at 72  
176 °C. We initiated the cycling with a 2-min denaturation at 94 °C and terminated it after 5-min  
177 incubation at 72 °C. Subsequently, we purified the amplified DNA using USB Exo-SAP-IT

178 (Affymetrix, Santa Clara, CA) and bidirectionally sequenced the amplicons using an ABI  
179 3130 DNA Analyzer (Applied Biosystems, Foster City, CA). For the three individuals of *A.*  
180 *snetsingeri* analyzed in their ITS2 locus and two for their CO1 locus, all the obtained ITS2  
181 and CO1 sequences were identical. The resulting consensus DNA sequences were submitted  
182 to NCBI GenBank under accession numbers MT957000-MT957001 (CO1) and MT957146-  
183 MT957148 (ITS2).

184

### 185 *Alignments and phylogenetic analyses*

186

187 We aligned the newly generated sequences with those of nine *Atypus* spp. obtained from  
188 NCBI GenBank as of September 7, 2020, and sequences of the corresponding outgroups by  
189 using MUSCLE (35,36) (gap opening penalty -400, gap extension penalty 0, clustering  
190 method UPGMB, lambda 24). We manually corrected the alignments for any inconsistencies,  
191 trimmed the aligned sequences to ensure that they all represent the same extent of the  
192 analyzed locus, removed short-length sequences from the alignments, and used only trimmed  
193 sequences for further analyses. The trimmed ITS2 locus [containing partial 5.8S ribosomal  
194 DNA and partial (close to full-length) ITS2 sequences] corresponded to nt 62-385 (324 bp) of  
195 *Atypus baotianmanensis* Hu, 1994 KP208877.1. The trimmed CO1 locus (partial CO1 coding  
196 sequence) corresponded to nt 23-595 (573 bp) of *Atypus piceus* KX536935.1. For each locus,  
197 we calculated the maximum likelihood fits of 24 nucleotide substitution models. We used a  
198 bootstrap procedure at 1,000 replicates and the nearest-neighbor-interchange as the maximum  
199 likelihood heuristic method to determine the tree inference when the initial tree was formed  
200 using a neighbor joining algorithm. We used best-fit models for the maximum likelihood  
201 phylogenetic analyses, including the estimates of evolutionary divergence between sequences.

202

## 203 **Results**

204

### 205 *Phylogenetic analysis*

206

207 Analysis of the DNA of *A. snetsingeri* has clarified its identity and the unusual presence of the  
208 genus in North America. We found that the CO1 locus (Fig. 6A) had a 100% sequence  
209 similarity (genetic distance of zero) with the matching 639bp-long CO1 locus of *A. karschi*  
210 (SDSU\_MY4706) from the Honshu island, Japan (Hedin et al. 2019). After *A. karschi* the  
211 most closely related species for which sequences were available was the Asian *Atypus*

212 *heterotheclus* Zhang, 1985, with a genetic distance of  $0.131 \pm 0.021$  of base substitutions per  
213 site between sequences. The European species, *Atypus piceus* and *Atypus affinis*, were basal to  
214 *A. snetsingeri* as well as to the whole group of hitherto sequenced Asian *Atypus* spp. (Fig.  
215 6A). Concerning the ITS2 locus, the sequences of only two other *Atypus* spp. are known (Fig.  
216 6B); therefore, this hypervariable locus awaits future analyses when more comparative data  
217 are available. The genetic distance to the closest species already sequenced in the ITS2 locus,  
218 *Atypus baotianmanensis*, was  $0.109 \pm 0.022$  of base substitutions per site between the  
219 sequences.

220

221 **Figure 6.** Phylogenetic analyses of the position of *Atypus karschi* (Pennsylvania, USA) in the  
222 genus *Atypus* based on the sequences of the CO1 (**A**) and ITS2 (**B**) loci by the maximum  
223 likelihood approach. The evolutionary history was inferred using the Tamura-Nei model (**A**)  
224 or the Kimura 2-parameter model (**B**), both with a discrete Gamma distribution used to model  
225 evolutionary rate differences among sites. The models were selected based on the highest  
226 Bayesian information criterion scores of the maximum likelihood fits. The trees are drawn to  
227 scale, with branch lengths indicating the number of substitutions per site. All codon positions,  
228 including noncoding positions, were included; the analyses were based on 573 positions (**A**)  
229 or 345 positions (**B**).

230

### 231 *Taxonomy*

232

233 Based on an exact match of the genetic CO1 barcode data, the *Atypus snetsingeri* purse-web  
234 spiders in Pennsylvania appear to represent an introduced local population of the Asian  
235 species *Atypus karschi*. In the remainder of this paper those spiders are referred to as *Atypus*  
236 *karschi* ‘from Pennsylvania’. The specific epithet *snetsingeri* is relegated to a junior synonym  
237 of *karschi*.

238

239 ***Atypus karschi*** Dönitz, 1887

240 *Atypus snetsingeri* Sarno, 1973: Sarno 1973 (21): page 38, figs 1–9 (description of both  
241 sexes). **New synonymy.**

242 *A. snetsingeri* Gertsch and Platnick 1980 (23): page 11, figs 9, 13–20 (both sexes).

243 *A. snetsingeri* Schwendinger 1990 (7): page 360, fig. 18 (female).

244



245 *Remarks.* The synonymy was based on finding that the CO1 gene, used as a molecular  
246 barcode, of *snetsingeri* specimens from Pennsylvania was identical with that of *Atypus*  
247 *karschi* from the Honshu island, Japan (37).

248

#### 249 *Karyotype*

250

251 The female karyotype of *A. karschi* from Pennsylvania showed  $2n = 42$  chromosomes and the  
252 male had  $2n = 41$  (Fig. 5A), suggesting an X0 sex chromosome system. Chromosomes were  
253 metacentric except for one pair, which exhibited submetacentric morphology (Fig. 5B). The  
254 chromosome pairs gradually decreased in size, with the length of chromosome pairs in the  
255 male ranging from 7.13% to 3.31% of TCL and in the female from 6.13% to 3.31% of TCL.  
256 The sex chromosome was a metacentric element of medium size in both male (TCL = 4.27%)  
257 and female (TCL = 4.09%) (Fig. 5A, B). Concerning meiosis, pachytene nuclei were found in  
258 both the male and female specimen. In the male pachytene, the univalent X chromosome was  
259 on the periphery of the nuclei. X chromosome arms were often associated with each other  
260 during this period. Moreover, the X chromosome showed positive heteropycnosis (i.e., it was  
261 stained more intensively than other chromosomes). The other bivalents exhibited prominent  
262 knobs (Fig. 5C).

263

264 **Figure 5.** Chromosomes of *Atypus karschi*, Pennsylvania, USA. **A, B.** Male (A) and female  
265 karyotypes (B), stained by Giemsa, based on mitotic metaphase.  $2n_{\text{♂}} = 41$ , X0;  $2n_{\text{♀}} = 42$ ,  
266 XX. Empty arrowhead – centromere of submetacentric pair. **C.** Male pachytene. Note  
267 heterochromatic X chromosome on the periphery of the nucleus and prominent knobs on the  
268 bivalents. Inset: scheme of sex chromosome. Note an association of X chromosome arms.  
269 Arrow – sex chromosome. **D.** Male mitotic metaphase, C-banding. Chromosomes exhibit  
270 intercalary and terminal heterochromatin blocks. Inset: magnified submetacentric chromosome  
271 containing a large block of heterochromatin (from another mitotic metaphase). Arrowhead – a  
272 large block of heterochromatin, empty arrowhead – centromere. **E.** Male mitotic metaphase,  
273 detection of rDNA cluster (FISH). Note chromosomes of a submetacentric pair containing a  
274 terminal rDNA cluster at long arm. Arrowhead – rDNA cluster, empty arrowhead –  
275 centromere. Scale bars: 10  $\mu\text{m}$ .

276

277 C-banded chromosomes exhibited small intercalary and terminal blocks of heterochromatin.  
278 The submetacentric pair showed a prominent large block at the terminal part of the long arm

279 (Fig. 5D). It occupied on average 36% of the chromosome length ( $n = 10$ ). The karyotype  
280 contained one NOR locus that was localized in the end of the long arm of the submetacentric  
281 pair (Fig. 5E). The NOR colocalised with the large block of heterochromatin and was of  
282 considerable size (37.2% of the chromosome length,  $n = 8$ ).

283

#### 284 *Habitat*

285

286 The eight *Atypus karschi* sites that we visited in Delaware County in 2013 represented  
287 suburban neighborhoods, small wooded parks, narrow riparian zones along developed stream  
288 corridors, and protected parklands (Appendix 1). The purse-webs were located in a variety of  
289 habitats at those sites, including the shrubs along suburban sidewalks, slopes and bottoms of  
290 wooded valleys, beech forests and a fallow field that is mowed annually. Typical habitats of  
291 *A. karschi* in Pennsylvania are shown in Fig. 1.

292

293 **Figure 1.** Habitats of *Atypus karschi* in Pennsylvania, USA; (1A) suburban bushes along Ellis  
294 Ave (~200 m from type locality of *Atypus snetsingeri*), (1B) fallow field at Tyler Arboretum,  
295 (1C) riparian woods, Swedish Cabin site on Darby Creek, (1D) forest, Smedley Park.

296

297 The inclination (slope) of the sites varied from 0–40°, ranging from a flat field to riparian  
298 hillsides. Where a site in our study had a slope it usually faced the south but the azimuth of  
299 orientation varied from 95–340°, excluding only the coldest north and north-east exposures.  
300 The soil on slopes was usually not aggregated, was sandy or powdery, and of yellow or grey  
301 color below the shallow humus layer. In valley bottoms, the spider lived in fluvisol and in the  
302 suburbs in anthropogenic soils. Soil penetrability ranges from 0.5 to 3.25 ( $n = 14$ , mean  $2.02$   
303  $\pm 0.31$ ). The webs are typically associated with woody vegetation, and bush/shrub cover  
304 ranged from 5–100 % (mean 40 %) and tree cover from 0–90 % (mean 50 %). The soil  
305 surface where webs occurred was without moss, and the herbaceous cover was usually sparse  
306 (from 0–90 %, mean 20 %).

307

#### 308 *Natural history*

309

310 The above-ground webs we observed were vertical and mostly attached to the base of thin  
311 stems of bushes or on trees (Figs 2, 3), but a few were attached to rock. In early November  
312 three size categories were visually distinguished in the field by their relative web diameters,

313 representing small and medium juveniles, and adult females. According to prey remnants  
314 found on their webs, they feed on millipedes (*Julida* and *Polydesmus* sp.), snails (*Cochlicopa*  
315 sp.), woodlice (*Porcellio* sp.) and carabid beetles.

316

317 **Figure 2.** *Atypus karschi* and its webs in Pennsylvania, USA, (2A) adult female and male (on  
318 the right), (2B) vertical web attached to the base of a tree and (2C) to a boulder, (2D)  
319 horizontal web covered in thatch, (2E) thatch removed, (2F) view of trimmed ground in front  
320 of bushes with 16 purse webs.

321

322 **Figure 3.** The distribution of *Atypus karschi* in Pennsylvania, USA. The peaks of the polygon  
323 represent the outermost sites. The circles mark the sites described in this study. The black  
324 circle is the type locality of *Atypus snetsingeri*.

325

326 Eleven out of 18 adult female webs that were excavated contained juveniles. There was no  
327 significant difference between the body size (carapace length) of the females with (n = 11)  
328 and without (n = 7) juveniles (all females: n = 18, min 5.04 mm, max 6.18 mm, mean  $5.68 \pm$   
329  $0.09$  mm) (Welch two sample *t*-test  $t = 1.45$ ,  $p = 0.17$ ). The number of juveniles ranged from  
330 70 to 201 (n = 10, mean  $121.30 \pm 11.66$ ) and did not correlate with the body size of the female  
331 (Pearson's correlation n = 10,  $r = 0.32$ ,  $p = 0.37$ ). The length of the subterranean section of  
332 tube associated with the burrow ranged from 6 to 10 cm (n = 13, mean  $8.3 \pm 0.3$  cm) and did  
333 not correlate with the body size of the spider (Pearson's correlation, n = 13,  $r = -0.44$ ,  $p =$   
334  $0.13$ ). The length of the above-ground tube ranged from 5 to 13 cm (n = 14, mean  $8.54 \pm 0.67$   
335 cm) and also did not correlate with the body size of the spider (Pearson's correlation,  $r = 0.02$ ,  
336  $p = 0.94$ ). The length of the above-ground purse-web was more variable than the length of its  
337 subterranean part (F test, n = 13,  $F = 0.23$ ,  $p = 0.018$ ) (Fig. 4). The ratio of below-  
338 ground/above-ground lengths ranged from 0.62 to 1.80 (n = 14, mean  $1.09 \pm 0.08$ ) and did not  
339 correlate with the body size of the spider (Pearson's correlation,  $r = 0.02$ ,  $p = 0.94$ ).

340

341 **Fig. 4.** Boxplots showing the variation of the below-ground and above-ground lengths of  
342 excavated purse-webs of *Atypus karschi*, Pennsylvania, USA (n = 13). The means are  
343 indicated by an x and the hollow dot indicates an outlier (less than the 25th percentile minus  
344  $1.5 \times$  Interquartile range).

345

346 **Discussion**

347

348 *Genetic identity of Atypus snetsingeri*

349

350 The presence of a geographically isolated population of an *Atypus* species in North America,  
351 where the native purse-web spiders are in the genus *Sphodros*, has been mildly controversial.  
352 Due to the species' location on the eastern coast of the USA a close relationship with  
353 European *Atypus* species could have been expected. However, morphologically, *A. snetsingeri*  
354 was known to closely resemble the Asian *A. karschi* (7,23). Raven (24) hypothesized that the  
355 single *Atypus* species in the USA was introduced by man.

356

357 The newly obtained molecular data for *A. snetsingeri* have resolved those questions by  
358 showing that the Pennsylvania species is more closely related to Asian species of *Atypus* than  
359 to European species. More specifically, *A. snetsingeri* was a genetic match with sequence data  
360 for *A. karschi* from Japan, affirming that the species represents an East Asian introduction.  
361 Based on these data we propose a formal synonymy for *A. snetsingeri*, which now becomes a  
362 junior synonym of *Atypus karschi*. Differences reported for morphological features compared  
363 to *A. karschi* in Asia probably represent intraspecific variation given the small number of *A.*  
364 *snetsingeri* specimens actually examined by researchers (7,23).

365

366 Parts of the genome of "*Atypus snetsingeri*" (based on NCBI sequences DQ639853.1,  
367 DQ680323.1 and KY016940.1) were used in spider phylogeny studies to represent the genus  
368 *Atypus* (37–39) or the entire family Atypidae (40). Wheeler et al. (1) used *A. snetsingeri* and  
369 *A. affinis* data to represent *Atypus*, and added *Sphodros* for the family Atypidae. Recently the  
370 entire mitochondrial genome was sequenced for *Atypus karschi* in China (41), which is highly  
371 useful for further comparative studies of the Atypoidea.

372

373 *Karyology*

374

375 Most karyotype data on spiders concerns araneomorphs (42), but some karyotypes of  
376 mygalomorph spiders have been published (17,18,20,43,44). Representatives of the  
377 superfamily Atypoidea display a similar range of diploid numbers as araneomorph spiders  
378 (from 14 to 47). Most Atypoidea also exhibit the X0 sex chromosome determination system,  
379 which may be the ancestral characteristic sex chromosome determination of this superfamily  
380 (20).

381

382 In the family Atypidae only four species in the genus *Atypus* have been studied  
383 cytogenetically. *Atypus karschi* in this study exhibits  $2n\♂ = 41$ , X0 and predominance of  
384 metacentric chromosomes, which is in accordance with the karyotypes of central European  
385 species *A. piceus* and *A. muralis* (18). These karyotype features could be ancestral within the  
386 genus *Atypus*. The karyotype of European *A. affinis* having  $2n\♂ = 14$ , XY, was derived from  
387 chromosomal complement  $2n\♂ = 41$ , X0 by series of chromosomal fusions leading to  
388 decreasing of diploid count and formation of a neo-sex chromosome system XY (18).

389

390 Remarkably, an earlier karyotype developed for *A. karschi* in Japan (19) differs considerably  
391 from those reported in this study from Pennsylvania. The karyotype reported from Japan  
392 consisted of approximately of 44 acrocentric chromosomes, including an  $X_1X_20$  system, not  
393 the 42 chromosomes and X0 pattern reported here. The discrepancy may be due to  
394 interpopulation variability, but although mygalomorph spiders exhibits considerable  
395 karyotype diversity (20), such an enormous degree of interpopulation karyotype variability is  
396 very unlikely. Therefore, we suggest that the karyotype data of the Japanese population may  
397 have been misinterpreted. The karyotype of *Atypus* is formed by relatively high number of  
398 small chromosomes, which makes it difficult to determine the precise diploid number and  
399 chromosome morphology. Moreover, the method of chromosome preparation used by Suzuki  
400 (19) did not include treatment with a hypotonic solution, so the spreading of chromosomes  
401 would have been less pronounced than in the present study using the methodology of Král et  
402 al. (20). Regarding determination of the sex chromosome system, a single metacentric X  
403 chromosome of an X0 system could be erroneously considered as two acrocentric X  
404 chromosomes of an  $X_1X_20$  system attached at one end during meiosis.

405

406 Within the framework of our cytogenetic analysis we were able to detect constitutive  
407 heterochromatin for the first time in the Atypoidea. Most chromosomes of *A. karschi*  
408 exhibited intercalary and terminal blocks of heterochromatin. The distribution of blocks  
409 suggests that 1) most intercalary blocks are placed at centromeric regions and 2) terminal  
410 blocks are formed at telomeric regions. This is consistent with the pattern of constitutive  
411 heterochromatin distribution most commonly found in spiders (43).

412

413 Nucleolus organizer regions (NORs) are chromosome domains comprised of tandemly  
414 repeated sequences of rRNA genes that aid formation of the nucleolus after division (45), and

415 their location on chromosomes may have taxonomic value. These regions have been detected  
416 in ten species of mygalomorphs including four species of Atypoidea ((20), this study). The  
417 number of NORs in Atypoidea ranges from one to four loci, and they are always situated on  
418 chromosome pairs. NORs are usually detected by impregnation with silver nitrate or by  
419 fluorescent in situ hybridization (FISH) with rDNA probe, although the first technique can  
420 underestimate absolute number of NORs by visualizing only loci transcribed during previous  
421 cell cycle (46). However, most NOR detections in mygalomorphs have been performed by  
422 silver staining. Fluorescence in situ hybridization, which we applied to detect NORs of *A.*  
423 *karschi* in this study, have been used with only one other mygalomorph species, *Tiltocatl*  
424 *albopilosum* Valerio, 1980 (Theraphosidae) (20). Both species display one terminal NOR  
425 localized on a chromosome pair, which may be the ancestral condition for spiders (20). The  
426 NOR of *A. karschi* is associated with heterochromatin, which is a common feature of rDNA in  
427 eukaryotes (e.g., (47,48)). Comparison of the length of the rDNA cluster and heterochromatin  
428 block suggests that heterochromatin associated with the NOR is formed by inactivated rDNA.  
429 This pattern is in an agreement with the current model for NOR organization, in which major  
430 regions of rDNA are often inactivated and only a restricted fraction of rDNA is transcribed  
431 (49).

432

#### 433 *Habitat*

434

435 *Atypus karschi* in Pennsylvania appears to be undemanding regarding habitat requirements  
436 (see Appendix 1) and can be locally abundant where it occurs. The webs are built in soil of  
437 varied humidity and physical parameters and are associated with a variety of supports (trees,  
438 shrubs, grasses, rock, walls and fences) over a ground surface either covered by or nearly  
439 devoid of litter. Webs were found on flat terrain and on slopes of various inclinations and  
440 orientation. In Pennsylvania it occurs in wooded areas but is also reliably found in some  
441 suburban neighborhoods, where webs are built at the base of shrubs or along walls and fences.  
442 Miyashita (50) reported a very similar situation in Japan where *A. karschi* is “common” and  
443 “usually live(s) in shady and humid places such as woods and shrubberies.” Images posted on  
444 iNaturalist (51) of *A. karschi* in East Asia also support a tolerance of human-modified settings  
445 where they were encountered (wall, fence and stone garden).

446

447 In sharp contrast, European *Atypus* species usually require very specific edaphic conditions  
448 and are associated with specific vegetation types and sun-facing slopes (14). Unlike *A. karschi*

449 in Pennsylvania, they are not found in habitats subject to recent or regular disturbance and are  
450 uncommon enough to be red-listed in all Central European countries. Their presence at a site  
451 is an indicator of a relic habitat worthy of conservation management (8,52).

452

453 *Natural history*

454

455 The life history of *A. karschi* in Japan was studied in detail by Miyashita (50) under semi-  
456 outdoor conditions and reported with prior data from Aoki (53) and Yaginuma (54). Basic  
457 natural history parameters of *A. karschi* in eastern Asia and *A. snetsingeri* in the USA are  
458 contrasted in Table 1 and indicated a similarity in every respect (body size, ontogeny,  
459 phenology, fecundity, morphology of webs, environment). No difference was found that  
460 would refute the conspecificity of the Pennsylvania population with Asian *A. karschi*.

461

462 **Table 1.** Natural history parameters (body size, ontogeny, phenology, fecundity, morphology  
 463 of webs, environment) reported for *Atypus karschi* in Japan and for the introduced population  
 464 known as *A. snetsingeri* in Pennsylvania, USA.  
 465

| <b>Natural history parameter</b>       | <i>Atypus karschi</i> - Japan                 | <i>Atypus snetsingeri</i> - USA                                                                       |
|----------------------------------------|-----------------------------------------------|-------------------------------------------------------------------------------------------------------|
| <b>Body size</b>                       |                                               |                                                                                                       |
| Carapace length of males               | 3.87–4.23 mm (55)                             | 3.2–4.6 mm (21)                                                                                       |
| Carapace length of females             | 4.77–5.76 mm (55)                             | 3.4–7.0 mm (21)                                                                                       |
| <b>Ontogeny</b>                        |                                               |                                                                                                       |
| No. of eggs                            | mean 124, maximum 270<br>(50)                 | mean 121, maximum 201<br>(this study)                                                                 |
| No. of moults before reaching maturity | 8–9 in males, 9–11 in females (50)            | unknown                                                                                               |
| Age of maturation                      | 3 years (50)                                  | possibly 3 years, based on three concurrent web size categories in the population (this study)        |
| <b>Phenology</b>                       |                                               |                                                                                                       |
| Mating season                          | June – (July) August (50,53)                  | June–August (21,22)                                                                                   |
| eggs                                   | July (August) - September (50,53,54)          | July-September (22)                                                                                   |
| larvae                                 | October (56,57)                               | September (22)                                                                                        |
| 1st nymphal instar                     | late October–April (dispersion) (50,53,53)    | September–March (dispersion) (22)                                                                     |
| <b>Morphology of webs</b>              |                                               |                                                                                                       |
| Orientation of the capturing tube      | vertically attached to the trunk or rock (57) | vertically attached to the tree, hedge or wall (21) or horizontally oriented in grass and thatch (22) |



|                              |                                                                            |                                                                          |
|------------------------------|----------------------------------------------------------------------------|--------------------------------------------------------------------------|
| Length of the capturing tube | Up to 20 cm (almost the same as the depth of the burrow) (57)              | Up to 25 cm (21)                                                         |
| Depth of the burrow          | Up to 20 cm (50,57)                                                        | Up to 20 cm (21)                                                         |
| <b>Environment</b>           |                                                                            |                                                                          |
| Microclimate                 | Shady and moist, in the forest close to the trees, rocks or bamboo (50,57) | Mostly shady and moist, in litter and areas with loose soil (this study) |
| Habitat                      | Forests and shrubs (50,57)                                                 | Forests and shrubs, disturbed areas (this study)                         |

466

467

468 Although Gertsch and Platnick (23) contemplated whether the above-ground purse-web  
469 orientation could be useful to distinguish between *Atypus* (horizontal tubes) and *Sphodros*  
470 (vertical tubes), species in both genera can and do make both kinds of webs (58). In our study  
471 we observed only vertical webs of *A. karschi* at the sites visited, but the spiders are known to  
472 make horizontal webs in thatch and grass (22). In Tyler's fallow field, for example, vertical  
473 webs can be found on plant stems within a few centimeters of horizontal webs in surrounding  
474 grasses. While vertical tubes are characteristic of North American *Sphodros* species, *Sphodros*  
475 *niger* Hentz, 1842 may preferentially build horizontal tubes, at least in some settings (59,60).  
476 Mckenna-Foster et al. (61) found that *Sphodros rufipes* Latreille, 1829 in New England will  
477 use whatever support is available and many webs were close to the ground. The suggestion  
478 that horizontal webs are an adaptation to prey capture under the snow (7) may ignore the  
479 function of vertical webs at ground level. In Pennsylvania *A. karschi* habitats experience snow  
480 and cold temperatures each year. In Tyler's field the horizontal tubes laying near the soil  
481 surface tend to be well-buffered by leaf litter or thatch, but basal sections of vertical webs are  
482 similarly buffered and may likewise function normally in a subnivean environment when both  
483 prey and spiders are active (Tessler, personal observations).

484

485 In this study we measured the webs of fourteen adult females from a fallow field with  
486 homogeneous soil. We found the overall length of the webs were shorter than those observed  
487 by Sarno (21) around a house foundation and on shrubs in a suburb (see Table 1), probably

488 reflecting different conditions and prey availability between sites. The length of the aerial  
489 tube was more variable than that of the underground part (Fig. 4). Less variation in the  
490 underground web length may reflect a minimum depth of the burrow necessary for suitable  
491 microclimate, constraints imposed on digging, or the shallow soil frost depth in winter. Depth  
492 of burrows differs among European *Atypus* species, where the species living in arid habitats  
493 tend to dig deeper burrows than those living in woody vegetation (8).

494

495 Concerning the number of juveniles found within maternal webs, *A. karschi* in Pennsylvania  
496 (max. 201 juveniles) has a similar number as *A. karschi* in Asia. Likewise, European *Atypus*  
497 species also have large broods (*A. affinis* max. 191, *A. piceus* max. 168, *A. muralis* max. 150;  
498 M. Řezáč, personal observations).

499

500 Prey we observed for *A. karschi* in Pennsylvania were mostly ground-based invertebrates and  
501 favored millipedes, similar to observations on *S. niger* in New England (60). *Atypus karschi* in  
502 Pennsylvania has also been observed feeding on earthworms, and will readily capture  
503 orthopteroids and other insects that contact the web while climbing vegetation, including the  
504 pestiferous spotted lanternfly (Hemiptera: Fulgoridae: *Lycorma delicatula* White, 1845) that  
505 was recently introduced into Pennsylvania from Asia (Tessler, personal observations).

506

#### 507 *Range of Atypus karschi in Pennsylvania*

508

509 *Atypus karschi* seems to possess several preadaptations that allowed it to successfully  
510 colonize southeastern Pennsylvania following its introduction. First, it occurs over a wide area  
511 in eastern Asia with a similar climate (Japan (57); Chinese provinces Hebei, Anhui, Sichuan,  
512 Guizhou, Hubei, Hunan, Fujian (55); Taiwan (62); Korea's Ungil Mountain (63)). Second, it  
513 produces a large number of lightweight juveniles that are capable of aerial dispersal  
514 (22,50,64). Third, the species in Pennsylvania is ecologically plastic and does not appear to  
515 have specific edaphic or microclimatic requirements, even thriving in settings frequently  
516 impacted by humans.

517

518 The original description and first review of the species *A. snetsingeri* in Pennsylvania was  
519 based on specimens taken from two nearby suburban sites in Lansdowne and Upper Darby in  
520 eastern Delaware County near Philadelphia (21,23). At that time, it was known to be common  
521 and unnoticed in the surrounding areas within the Cobbs Creek and Darby Creek drainage

522 basins (Tessler, personal observations). It has subsequently been sought and found in many  
523 (not all) of the forested riparian zones and wooded parklands across Delaware County and  
524 also at sites in adjacent areas of Philadelphia, Montgomery, Chester and Berks counties (Fig.  
525 Map). Many neighboring areas, including most of urban Philadelphia, remain unexplored  
526 (22). A few of those species determinations were based finding males, but the majority  
527 involved excavating a web to extract the spider and examine the sternum sigilla pattern and  
528 the posterior lateral spinnerets (PLS) to distinguish it from *Sphodros* species (23). In  
529 particular, *A. snetsingeri* has a distinctly four-segmented PLS, whereas the northern *Sphodros*  
530 species have only three segments (*S. niger*, *S. rufipes*, *S. atlanticus*).

531

532 Spiderlings of *A. karschi* in Pennsylvania use silk for aerial dispersal in the spring (22), which  
533 may have contributed to expanding its range from an original introduction locus. However,  
534 the association of these spiders with highly developed land and disturbed habitats suggests a  
535 wider transport opportunity via trees, woody shrubs and mulch moved within the region by  
536 landscaping and nursery industries (Tessler, personal observations).

537

538 Interestingly, *Sphodros* purse-web spiders are also found in Pennsylvania and adjacent states  
539 (23), but none have ever been reported in the same areas as *A. snetsingeri*. This is  
540 unsurprising because atypids and their webs are rarely noticed or reported even when they are  
541 locally abundant (22,65). Sightings of wandering *Sphodros* males reported in iNaturalist (66)  
542 indicate that *S. niger* is found in Pennsylvania west and north of the *A. karschi* area and  
543 southward in neighboring states, and that *S. rufipes* occurs in Maryland and New Jersey south  
544 and east of the Philadelphia area and northward into coastal New England. While perhaps  
545 provocative, those observations are not evidence of displacement of any local species by the  
546 introduction of *A. karschi*.

547

548 It is unlikely that the source and timing of *A. karschi*'s introduction to Pennsylvania will ever  
549 be determined. The species has a broad native range in East Asia extending from China and  
550 Taiwan to Japan (12), and it was recently reported in Korea (63). The Philadelphia region  
551 (including Delaware County) has had a 300 year history of trade with East Asia that may have  
552 included countless opportunities for accidental importation of a soil-associated spider among  
553 potted plants. Indeed, Nentwig (67) suggests that spiders introduced with potted plants have  
554 higher establishment rates relative to those introduced by other means. In the 1700s and 1800s  
555 Philadelphia was the center of American botany and horticulture and many plants from

556 around the world, including Asia, were actively collected, imported and traded for exhibition  
557 and cultivation in public and private gardens (68,69). Many of the region's great gardens and  
558 arboreta of that era still exist to some extent (70), including Tyler Arboretum (visited in this  
559 study) and Bartram's Garden in west Philadelphia, the home of noted American botanists  
560 John Bartram and his son William (71,72). William Bartram's contemporary in the late 1700s,  
561 William Hamilton, built his estate "The Woodlands" overlooking Philadelphia's Schuylkill  
562 River and his gardens and greenhouse boasted of having every rare plant he'd ever heard of  
563 from around the world (73,74). In 1784, after the American Revolution, direct shipping trade  
564 began between Philadelphia and China and at its peak represented about a third of all US  
565 trade with China (75). A very significant Asian botanical importation event occurred later, in  
566 1926, when the Japanese government presented 1,600 flowering trees to the City of  
567 Philadelphia to celebrate the 150<sup>th</sup> anniversary of American independence (76). Regarding  
568 introductions of other soil-associated invertebrates, Asian jumping worms (*Amyntas* and  
569 *Metaphire* spp.) were presumably brought to the US in the 1800s in the soil of potted plants,  
570 and recent studies have shown that they displace native worms and are changing the soil  
571 where they occur (77). Coincidentally, nonnative jumping worms are present at many *A.*  
572 *karschi* sites in Pennsylvania (Tessler, personal observations).

573

#### 574 *Conclusion*

575

576 Many spider species have been accidentally introduced by humans to a new continent and  
577 became established (67), nearly all from the phylogenetically recent infraorder  
578 Araneomorphae. Within the more primitive mygalomorphs, the Mexican redrump tarantula  
579 (Theraphosidae) native to Mexico and Central America has become established in Florida  
580 USA (78). Presumably escaped from the pet trade, these tarantulas dig burrows and appear to  
581 be restricted to a small area with climate and habitat features similar to its native range. In this  
582 study we show that *Atypus snetsingeri* in Pennsylvania is genetically conspecific with *Atypus*  
583 *karschi* native to East Asia. The species appears to have been introduced by humans to  
584 Pennsylvania, probably in association with potted plants, and is now naturalized and locally  
585 common within a limited range that includes urban and forested areas. It is unlikely that the  
586 source or timing of the introduction can be determined in a region renowned for its colonial-  
587 era horticulturalists, elaborate international gardens, and long history of shipping trade with  
588 East Asia. This is the first case of an introduced species of Atypoidea from the infraorder  
589 Mygalomorphae.

590

591 **Author contributions:**

592 Performed the taxonomic and ecological observations: MR, ST. Performed the karyological  
593 analyses: IH, MF, JK. Performed the molecular analyses: PH. Prepared the figures: NG, ST,  
594 JK, PH. Wrote the paper: MR, ST, JK, PH, NG, IH, VR.

595

596 **Acknowledgements:**

597 We thank Tereza Kořínková for her comments on the manuscript, Marie L. Schmidt for her  
598 help with the research in Pennsylvania, and the Tyler Arboretum for permission to work on  
599 the property and collect specimens for scientific study. The study was supported by the  
600 Ministry of Education, Youth and Sports of the Czech Republic (project LTAUSA18171) and  
601 by the Ministry of Agriculture of the Czech Republic (project MZe RO0418). The  
602 chromosome part of this study was funded by the Charles University (project 92218) and  
603 Ministry of Education, Youth, and Sports of the Czech Republic (projects SVV-260568 and  
604 LTAUSA19142).

605

- 606 1. Wheeler WC, Coddington JA, Crowley LM, Dimitrov D, Goloboff PA, Griswold CE, et al. The  
607 spider tree of life: phylogeny of Araneae based on target-gene analyses from an extensive  
608 taxon sampling. *Cladistics*. 2017;33(6): 574–616.
- 609 2. Enock F. The life-history of *Atypus piceus*, Sulz. *Trans R Entomol Soc Lond*. 1885;33(4): 389–420.
- 610 3. McCook HC. Nesting habits of the American purseweb spider. *Proc Acad Nat*. 1888;40: 203-220.  
611 Available from: <https://www.biodiversitylibrary.org/bibliography/6885>
- 612 4. Poteat WL. A tube-building spider. Notes on the architectural and feeding habits of *Atypus niger*  
613 Hentz. *J Elisha Mitchell Sci Soc*. 1890;6(2): 132–47.
- 614 5. Platnick NI. *Spiders of the world: A natural history*. London: Princeton University Press; 2020.
- 615 6. Bristowe WS. *World of spiders*. Collins; 1958.
- 616 7. Schwendinger PJ. A synopsis of the genus *Atypus* (Araneae, Atypidae). *Zoologica Scripta*.  
617 1990;19(3): 353–66.
- 618 8. Řezáč M, Heneberg P. Conservation status of the only representative of infraorder  
619 Mygalomorphae (Araneae) in cultivated regions of Central Europe. *J Insect Conserv*. 2014;18(4):  
620 523–37.
- 621 9. Coyle FA. Aerial Dispersal by Mygalomorph Spiderlings (Araneae, Mygalomorphae). *J Arachnol*.  
622 1983;11(2): 283–6.

- 623 10. Coyle FA, Greenstone MH, Hultsch A-L, Morgan CE. Ballooning Mygalomorphs: Estimates of the  
624 Masses of Sphodros and Ummidia Ballooners (Araneae: Atypidae, Ctenizidae). *J Arachnol.*  
625 1985;13(3): 291–6.
- 626 11. Nentwig W, Blick T, Bosmans R, Gloor D, Hänggi A, Kropf C. Spiders of Europe. Version 5; 2021  
627 [cited 20 May 2021]. Database [Internet]. Available from: <https://www.araneae.nmbe.ch>
- 628 12. World Spider Catalog. World Spider Catalog; 2021 [cited 30 Mar 2021]. Natural History Museum  
629 Bern. [Internet]. Available from: <http://wsc.nmbe.ch>
- 630 13. Dippenaar-Schoeman AS, Jocqué R. African spiders: an identification manual. Pretoria: ARC-  
631 Plant Protection Research Institute; 1997.
- 632 14. Řezáč M, Řezáčová V, Pekár S. The distribution of purse-web *Atypus spiders* (Araneae:  
633 Mygalomorphae) in central Europe is constrained by microclimatic continentality and soil  
634 compactness. *J Biogeogr.* 2007;34(6): 1016–27.
- 635 15. Řezáč M, Tošner J, Heneberg P. Habitat selection by threatened burrowing spiders (Araneae:  
636 Atypidae, Eresidae) of central Europe: evidence base for conservation management. *J Insect*  
637 *Conserv.* 2018 Feb 1;22(1): 135–49.
- 638 16. National Center for Biotechnology Information (NCBI). Query results for Atypidae genome data;  
639 2021 [cited 23 Oct 2021] Database [Internet]. Available from:  
640 <https://www.ncbi.nlm.nih.gov/nuccore/?term=atypidae>
- 641 17. Král J, Kořínková T, Forman M, Krkavcová L. Insights into the Meiotic Behavior and Evolution of  
642 Multiple Sex Chromosome Systems in Spiders. *CGR.* 2011;133(1): 43–66.
- 643 18. Řezáč M, Král J, Musilová J, Pekár S. Unusual karyotype diversity in the European spiders of the  
644 genus *Atypus* (Araneae: Atypidae). *Hereditas.* 2006;143(2006): 123–9.
- 645 19. Suzuki S. Cytological studies in spiders. III. Studies on the chromosomes of fifty-seven species of  
646 spiders belonging to seventeen families, with general considerations on chromosomal  
647 evolution. *J Sci Hiroshima Univ(B).* 1954;15: 23–136.
- 648 20. Král J, Kořínková T, Krkavcová L, Musilová J, Forman M, Herrera IMÁ, et al. Evolution of  
649 karyotype, sex chromosomes, and meiosis in mygalomorph spiders (Araneae: Mygalomorphae).  
650 *Biol J Linn.* 2013;109(2): 377–408.
- 651 21. Sarno PA. New species of *Atypus*. *Entomol News Philadelphia.* 1973; 37-51.
- 652 22. Tessler S. Map the Spider; 2021 [cited 2021 Mar 30]. Available from:  
653 <http://www.mapthespider.com/>
- 654 23. Gertsch WJ, Platnick NI. A revision of the American spiders of the family Atypidae (Araneae,  
655 Mygalomorphae). *Am Mus Novit*; no. 2704; 1980. Available from:  
656 <https://digitallibrary.amnh.org/handle/2246/5390>
- 657 24. Raven RJ. The spider infraorder Mygalomorphae (Araneae): cladistics and systematics. *Bull Am*  
658 *Mus Nat.* 1985;182. Available from: <https://digitallibrary.amnh.org/handle/2246/955>

- 659 25. Srba M, Heneberg P. Nesting habitat segregation between closely related terricolous sphecid  
660 species (Hymenoptera:Spheciformes): key role of soil physical characteristics. *J Insect Conserv.*  
661 2012;16(4): 557–70.
- 662 26. R Core Team. R: A language and environment for statistical computing [Internet]. Vienna,  
663 Austria: R Foundation for Statistical Computing; 2019. Available from: [http://www.r-](http://www.r-project.org/)  
664 [project.org/](http://www.r-project.org/)
- 665 27. Schneider CA, Rasband WS, Eliceiri KW. NIH Image to ImageJ: 25 years of image analysis. *Nature*  
666 *methods.* 2012;9(7): 671–5.
- 667 28. Levan A, Fredga K, Sandberg AA. Nomenclature for centromeric position on chromosomes.  
668 *Hereditas.* 1964;52(2): 201–20.
- 669 29. Král J, Kováč L, Št'áhlavský F, Lonský P, L'uptáček P. The first karyotype study in palpigrades, a  
670 primitive order of arachnids (Arachnida: Palpigradi). *Genetica.* 2008;134(1): 79–87.
- 671 30. Forman M, Nguyen P, Hula V, Král J. Sex Chromosome Pairing and Extensive NOR Polymorphism  
672 in *Wadicosa fidelis* (Araneae: Lycosidae). *CGR.* 2013;141(1): 43–9.
- 673 31. Heneberg P, Řezáč M. Two *Trichosporon* species isolated from Central-European mygalomorph  
674 spiders (Araneae: Mygalomorphae). *Antonie van Leeuwenhoek.* 2013 Apr 1;103(4):713–21.
- 675 32. White TJ, Bruns T, Lee S, Taylor J. Amplification and direct sequencing of fungal ribosomal RNA  
676 genes for phylogenetics. *PCR protocols: a guide to methods and applications.* 1990;18(1): 315–  
677 22.
- 678 33. Folmer O, Black M, Wr H, Lutz R, Vrijenhoek R. DNA primers for amplification of mitochondrial  
679 Cytochrome C oxidase subunit I from diverse metazoan invertebrates. *Mol Mar Bio Biotechnol.*  
680 1994 Nov 1;3: 294–9.
- 681 34. Bidegaray-Batista L, Macías-Hernández N, Oromí P, Arnedo MA. Living on the edge:  
682 demographic and phylogeographical patterns in the woodlouse-hunter spider *Dysdera*  
683 *lancerotensis* Simon, 1907 on the eastern volcanic ridge of the Canary Islands. *Mol Ecol.*  
684 2007;16(15): 3198–214.
- 685 35. Madeira F, Park Y, Lee J, Buso N, Gur T, Madhusoodanan N, Basutkar P, Tivey ARN, Potter SC,  
686 Finn RD, et al. The EMBL-EBI Search and Sequence Analysis Tools APIs in 2019. *Nucleic Acids*  
687 *Res.* 2019;47: W636-W641.
- 688 36. National Center for Biotechnology Information (NCBI). Query results for *Atypus* genome data  
689 [Internet]. 2021 [cited 2021 Jul 1]. Available from:  
690 [https://www.ncbi.nlm.nih.gov/nuccore/?term=Atypus%20\[Organism\]](https://www.ncbi.nlm.nih.gov/nuccore/?term=Atypus%20[Organism])
- 691 37. Hedin M, Derkarabetian S, Alfaro A, Ramírez MJ, Bond JE. Phylogenomic analysis and revised  
692 classification of atypoid mygalomorph spiders (Araneae, Mygalomorphae), with notes on  
693 arachnid ultraconserved element loci. *PeerJ.* 2019;7: e6864.
- 694 38. Hedin M, Bond JE. Molecular phylogenetics of the spider infraorder Mygalomorphae using  
695 nuclear rRNA genes (18S and 28S): conflict and agreement with the current system of  
696 classification. *Mol Phylogenet Evol.* 2006;41(2): 454–71.

- 697 39. Bond JE, Hendrixson BE, Hamilton CA, Hedin M. A reconsideration of the classification of the  
698 spider infraorder Mygalomorphae (Arachnida: Araneae) based on three nuclear genes and  
699 morphology. *PloS one*. 2012;7(6): e38753.
- 700 40. Ayoub NA, Garb JE, Hedin M, Hayashi CY. Utility of the nuclear protein-coding gene, elongation  
701 factor-1 gamma (EF-1 $\gamma$ ), for spider systematics, emphasizing family level relationships of  
702 tarantulas and their kin (Araneae: Mygalomorphae). *Mol Phylogenet Evol*. 2007;42(2): 394–409.
- 703 41. He A, Guo J, Peng H, Huang Z, Liu J, Xu X. The complete mitochondrial genome of *Atypus karschi*  
704 (Araneae, Atypidae) with phylogenetic consideration. *Mitochondrial DNA Part B*. 2021;6(9):  
705 2523–5.
- 706 42. Araujo D, Schneider MC, Paula-Neto E, Cella DM. The World spider cytogenetic database  
707 [Internet]. 2020 [cited 2020 Jul 30]. Available from:  
708 <http://www.arthropodacytogenetics.bio.br/spiderdatabase/>
- 709 43. Kořínková T, Král J. Karyotypes, sex chromosomes, and meiotic division in spiders. In: *Spider*  
710 *ecophysiology*. Springer; 2013. p. 159–71.
- 711 44. Sember A, Pappová M, Forman M, Nguyen P, Marec F, Dalíková M, et al. Patterns of Sex  
712 Chromosome Differentiation in Spiders: Insights from Comparative Genomic Hybridisation.  
713 *Genes*. 2020;11(8): 849.
- 714 45. Clark MS, Wall WJ. *Chromosomes: the complex code*. [Internet]. London: Chapman & Hall Ltd;  
715 1996 [cited 2021 Mar 29]. 345 p. Available from:  
716 <https://www.cabdirect.org/cabdirect/abstract/19960106700>
- 717 46. Miller DA, Dev VG, Tantravahi R, Miller OJ. Suppression of human nucleolus organizer activity in  
718 mouse-human somatic hybrid cells. *Experimental Cell Research*. 1976;101(2): 235–43.
- 719 47. Fujiwara A, Abe S, Yamaha E, Yamazaki F, Yoshida MC. Chromosomal localization and  
720 heterochromatin association of ribosomal RNA gene loci and silver-stained nucleolar organizer  
721 regions in salmonid fishes. *Chromosome Res*. 1998;6(6): 463–71.
- 722 48. Guetg C, Santoro R. Formation of nuclear heterochromatin. *Epigenetics*. 2012;7(8): 811–4.
- 723 49. Carmo-Fonseca M, Mendes-Soares L, Campos I. To be or not to be in the nucleolus. *Nat Cell*  
724 *Biol*. 2000;2(6): E107–12.
- 725 50. Miyashita K. Postembryonic Development and Life Cycle of *Atypus karschi* DONITZ (Araneae:  
726 Atypidae). 1992;10.
- 727 51. iNaturalist. Images of *Atypus karschi*. [Internet]. 2021 [cited 2021 Jul 28]. Available from:  
728 [https://www.inaturalist.org/observations?verifiable=true&taxon\\_id=360542](https://www.inaturalist.org/observations?verifiable=true&taxon_id=360542)
- 729 52. British Arachnology Society. Spider and Harvestman Recording Scheme website | Summary for  
730 *Atypus affinis* (Araneae). [Internet]. 2021 [cited 2021 Jul 29]. Available from:  
731 <http://srs.britishspiders.org.uk/portal.php/p/Summary/s/Atypus+affinis>
- 732 53. Aoki T. On the life cycle of Jigumo (*Atypus karschi* Dön.) in Wakajama city. *Nanki-Seibutsu*  
733 *Suppl*. 1983;25: 43–8.
- 734 54. Yaginuma T. *Spiders of Japan in Colour* (enl, rev. ed.). Osaka: Hoikusha Publishing Co.; 1978.



- 735 55. Zhu M-S, Zhang F, Song D, Qu P. A revision of the genus *Atypus* in China (Araneae: Atypidae).  
736 *Zootaxa*. 2006;1118(1): 1.
- 737 56. Bösenberg W, Strand E. Japanische spinnen. 1906.
- 738 57. Dönitz W. Über die Lebensweise Zweier Vogelspinnen aus Japan. Sitzungsberichte der  
739 Gesellschaft naturforschender Freunde zu Berlin. 1887;8–10.
- 740 58. Schwendinger PJ. On the genus *Atypus* (Araneae: Atypidae) in northern Thailand. *Bull Br*  
741 *Arachnol Soc*. 1989;8(3): 89–96.
- 742 59. Beatty JA. Web structure and burrow location of *Sphodros niger* (Hentz) (Araneae: Atypidae).  
743 *Journal of Arachnology* 14: 130-132. [Internet]. 1986 [cited 2021 Jul 21]. Available from:  
744 [https://www.americanarachnology.org/journal-joa/joa-all-](https://www.americanarachnology.org/journal-joa/joa-all-volumes/detail/article/download/JoA_v14_p130_grey.pdf)  
745 [volumes/detail/article/download/JoA\\_v14\\_p130\\_grey.pdf](https://www.americanarachnology.org/journal-joa/joa-all-volumes/detail/article/download/JoA_v14_p130_grey.pdf)
- 746 60. Edwards RL, Edwards EH. Observations on the natural history of a New England population of  
747 *Sphodros niger* (Araneae, Atypidae). *J Arachnol*. 1990;29–34.
- 748 61. Mckenna-Foster A, Draney ML, Beaton C. An unusually dense population of *Sphodros rufipes*  
749 (Mygalomorphae: Atypidae) at the edge of its range on Tuckernuck Island, Massachusetts. *J*  
750 *Arachnol*. 2011;39(1): 171–3.
- 751 62. Saitō S. On the spiders from Tohoku (northernmost part of the main island), Japan. *Saito Ho-on*  
752 *Kai Museum Research Bulletin*. 1939;18: 1–91.
- 753 63. Kim J, Cho Y. Unrecorded Korean *Atypus karschii* Doenitz (Atypidae Thorell, Genus *Atypus*).  
754 *Korean Arachnology*. 2019;35 (1-2): 1–4.
- 755 64. Katsura K. A note on a ballooning of *Atypus karschi*. *Atypus*. 1975;64: 6.
- 756 65. Moler PE, Stevenson DJ, Mansell BW, Mays JD, Lee CW. Distribution and Natural History of  
757 Purseweb Spiders, *Sphodros* spp. (Araneae: Mygalomorphae: Atypidae), in Florida, Georgia, and  
758 Alabama. *Southeastern Naturalist*. 2020;19(4): 663–72.
- 759 66. iNaturalist. Map of the Genus *Sphodros*. [Internet]. 2021 [cited 2021 Jul 21]. Available from:  
760 [https://www.inaturalist.org/observations?place\\_id=any&subview=map&taxon\\_id=61444](https://www.inaturalist.org/observations?place_id=any&subview=map&taxon_id=61444)
- 761 67. Nentwig W. Introduction, establishment rate, pathways and impact of spiders alien to Europe.  
762 *Biol Invasions*. 2015;17(9): 2757–78.
- 763 68. Chesney S. Encyclopedia of Greater Philadelphia | Botany. [Internet]. 2017 [cited 2020 Dec 14].  
764 Available from: <https://philadelphiaencyclopedia.org/archive/botany/>
- 765 69. Sarudy B. Colonial and Early American Gardens: The Greenhouse in Early America [Internet].  
766 2020 [cited 2021 Aug 24]. Available from:  
767 [https://americangardenhistory.blogspot.com/2018/12/the-greenhouse-conservatory-in-](https://americangardenhistory.blogspot.com/2018/12/the-greenhouse-conservatory-in-early.html)  
768 [early.html](https://americangardenhistory.blogspot.com/2018/12/the-greenhouse-conservatory-in-early.html)
- 769 70. Klein WM. *Gardens of Philadelphia & the Delaware Valley*. Temple University Press; 1995.
- 770 71. Rehder A. On the History of the Introduction of Woody Plants into North America. *Arnoldia*  
771 6:13-23 [Internet]. 1946 [cited 2021 Jun 21]. Available from:

- 772 <http://arnoldia.arboretum.harvard.edu/pdf/articles/1946-6—on-the-history-of-the->  
773 [introduction-of-woody-plants-into-north-america.pdf](http://arnoldia.arboretum.harvard.edu/pdf/articles/1946-6—on-the-history-of-the-introduction-of-woody-plants-into-north-america.pdf)
- 774 72. O'Malley T. The Evidence of American Garden History. History of Early American Landscape  
775 Design [Internet]. 2021 [cited 2021 Aug 24]. Available from:  
776 [https://heald.nga.gov/mediawiki/index.php?title=The\\_Evidence\\_of\\_American\\_Garden\\_History](https://heald.nga.gov/mediawiki/index.php?title=The_Evidence_of_American_Garden_History&oldid=40049)  
777 [&oldid=40049](https://heald.nga.gov/mediawiki/index.php?title=The_Evidence_of_American_Garden_History&oldid=40049)
- 778 73. Stetson SP. William Hamilton and His "Woodlands". The Pennsylvania Magazine of History and  
779 Biography. 1949;73(1): 26–33.
- 780 74. Madsen K. To Make His Country Smile: William Hamilton's Woodlands. Arnoldia. 1989;49(2):  
781 14–24.
- 782 75. Norwood D. The Encyclopedia of Greater Philadelphia | China Trade. [Internet]. 2016 [cited  
783 2021 Jun 15]. Available from: <https://philadelphiaencyclopedia.org/archive/china-trade/>
- 784 76. Japan Society of Greater Philadelphia. Shofuso | History [Internet]. 2021 [cited 2021 Jul 15].  
785 Available from: [https://japanphilly.org/programs/festivals/subaru-cherry-blossom-](https://japanphilly.org/programs/festivals/subaru-cherry-blossom-festival/about/history/)  
786 [festival/about/history/](https://japanphilly.org/programs/festivals/subaru-cherry-blossom-festival/about/history/)
- 787 77. Qiu J, Turner MG. Effects of non-native Asian earthworm invasion on temperate forest and  
788 prairie soils in the Midwestern US. Biological Invasions. 2017;19(1): 73–88.
- 789 78. Edwards GB, Hibbard K. The Mexican Redrump, *Brachypelma vagans* (Araneae: Theraphosidae),  
790 an exotic tarantula established in Florida. Entomology Circular No. 394, May/June 1999, 2pp.  
791 [Internet]. 1999 [cited 2021 Jul 19]. Available from:  
792 <https://www.fdacs.gov/content/download/10780/file/ent394.pdf>
- 793

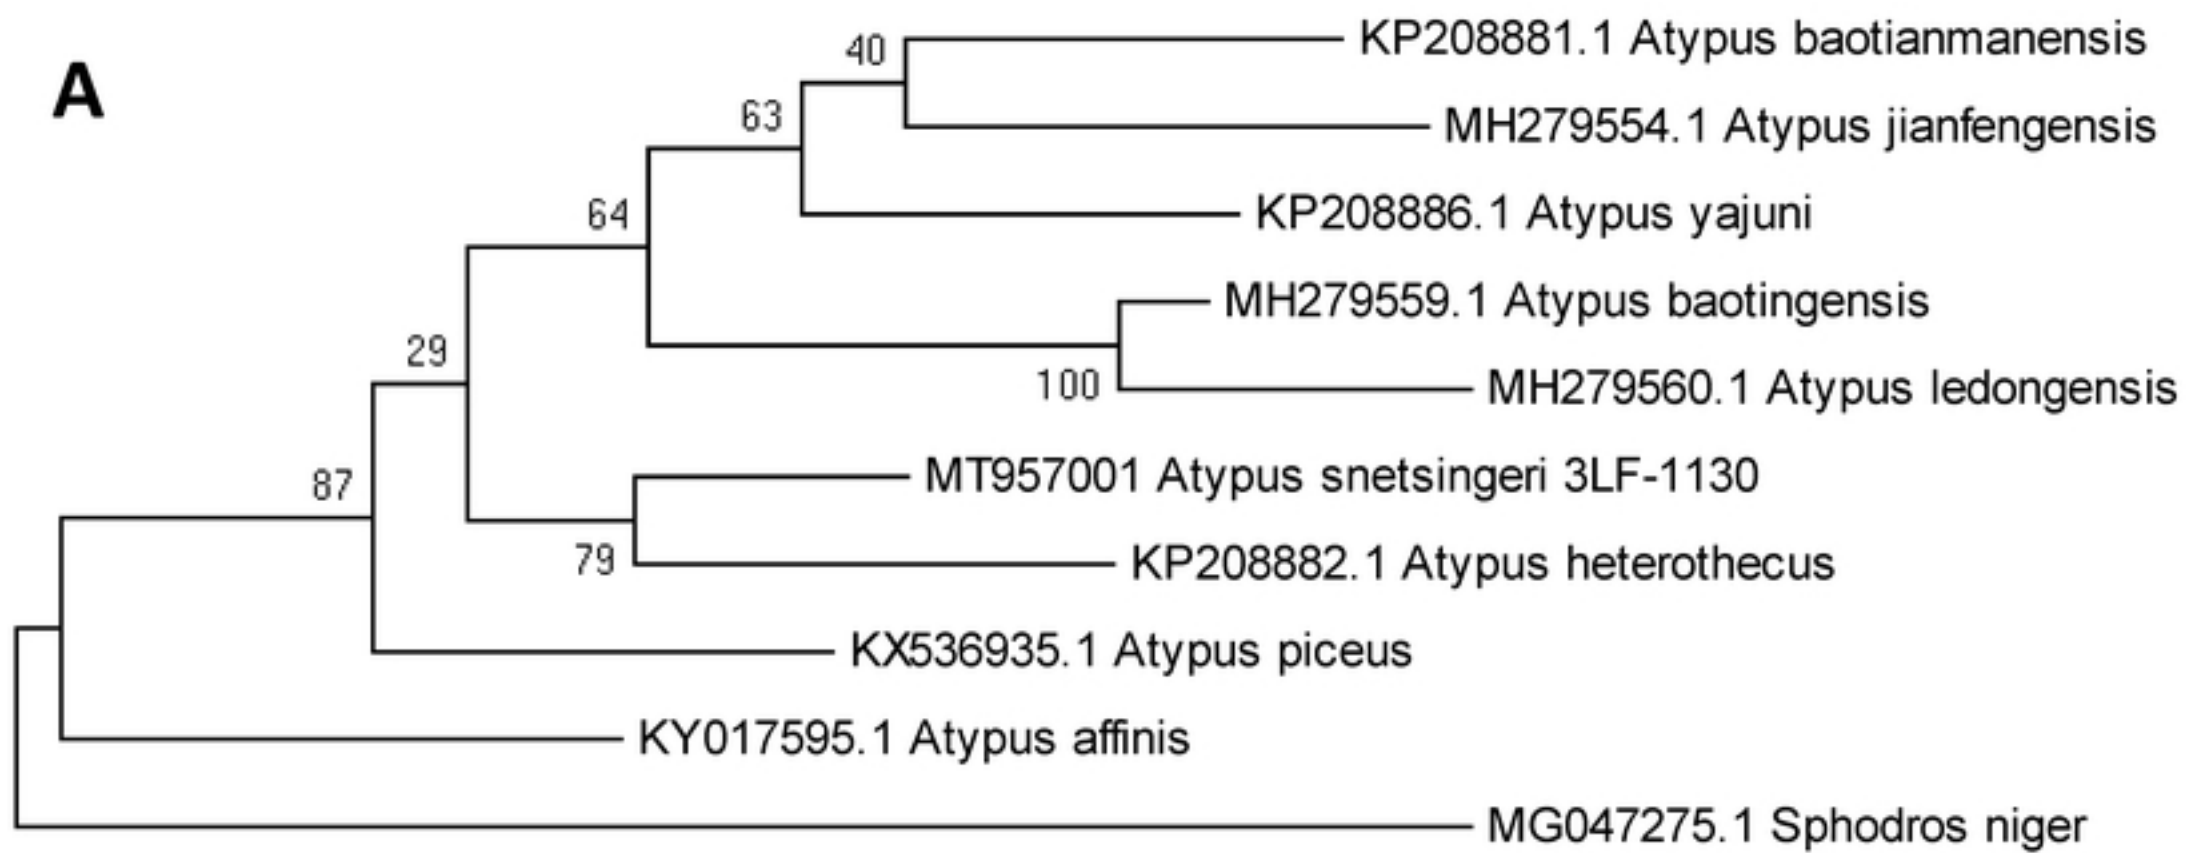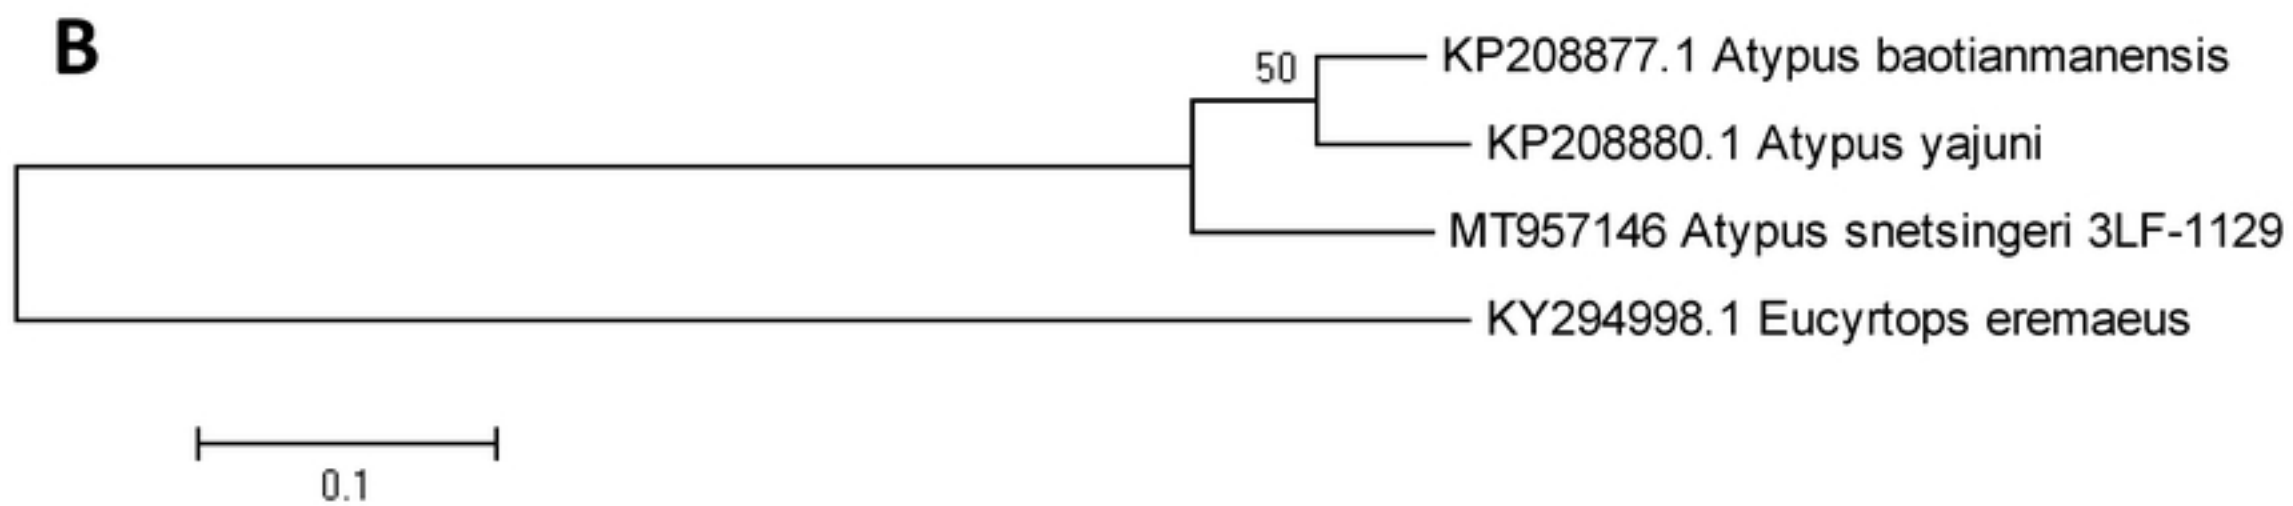

Figure 6

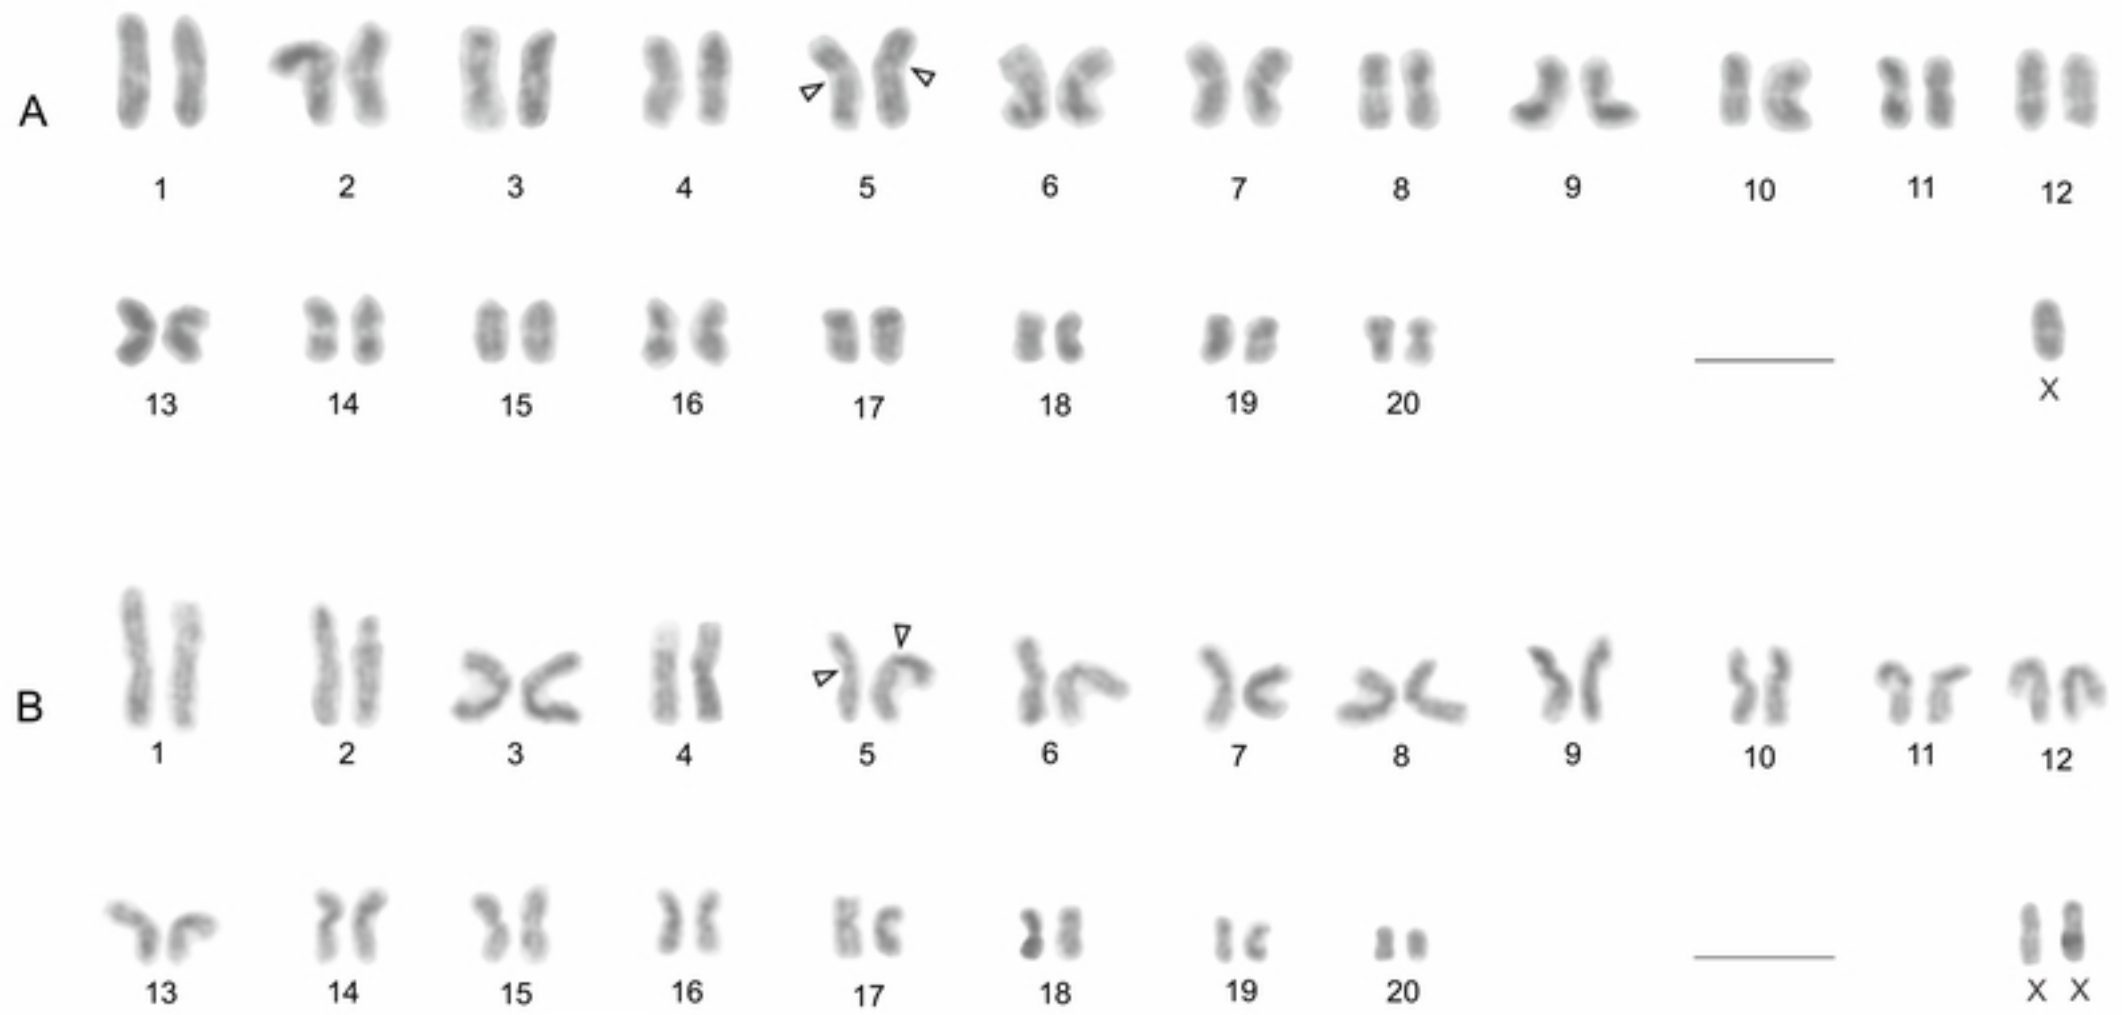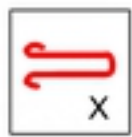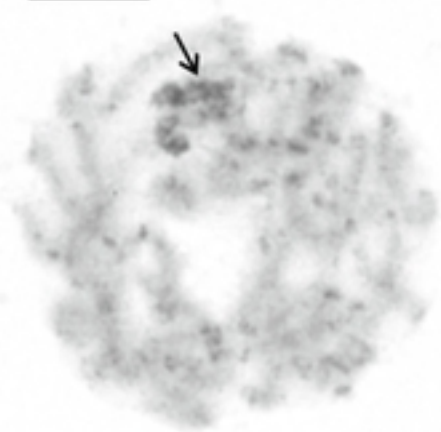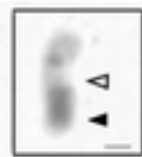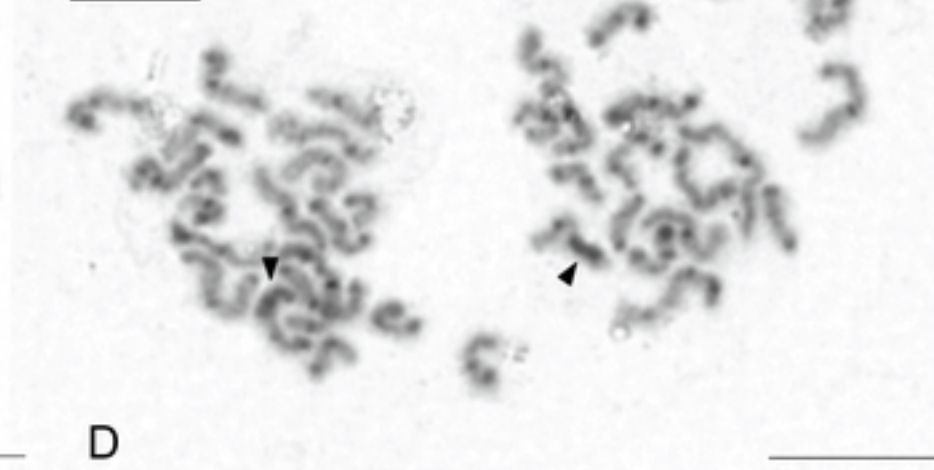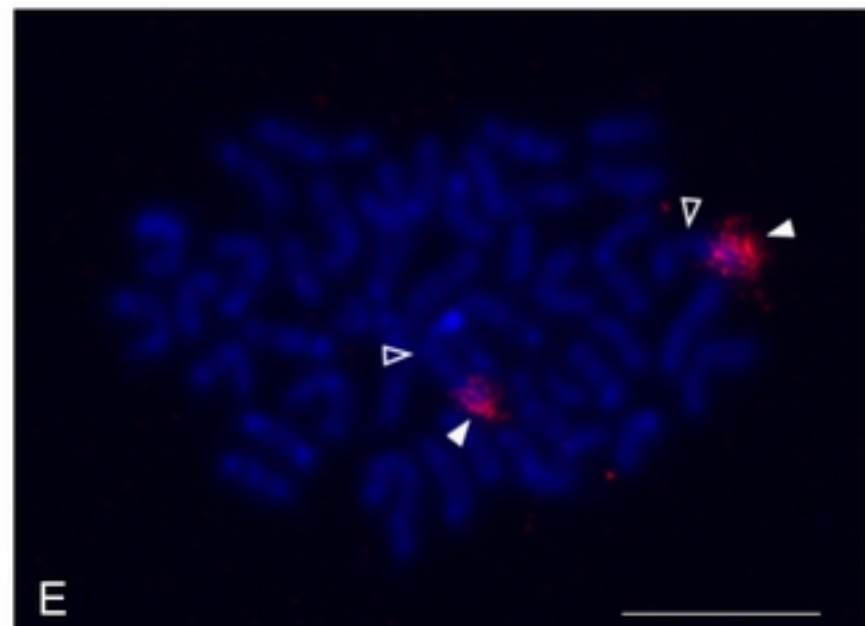

Figure 5

bioRxiv preprint doi: <https://doi.org/10.1101/2021.12.09.471987>; this version posted December 9, 2021. The copyright holder for this preprint (which was not certified by peer review) is the author/funder, who has granted bioRxiv a license to display the preprint in perpetuity. It is made available under aCC-BY 4.0 International license.

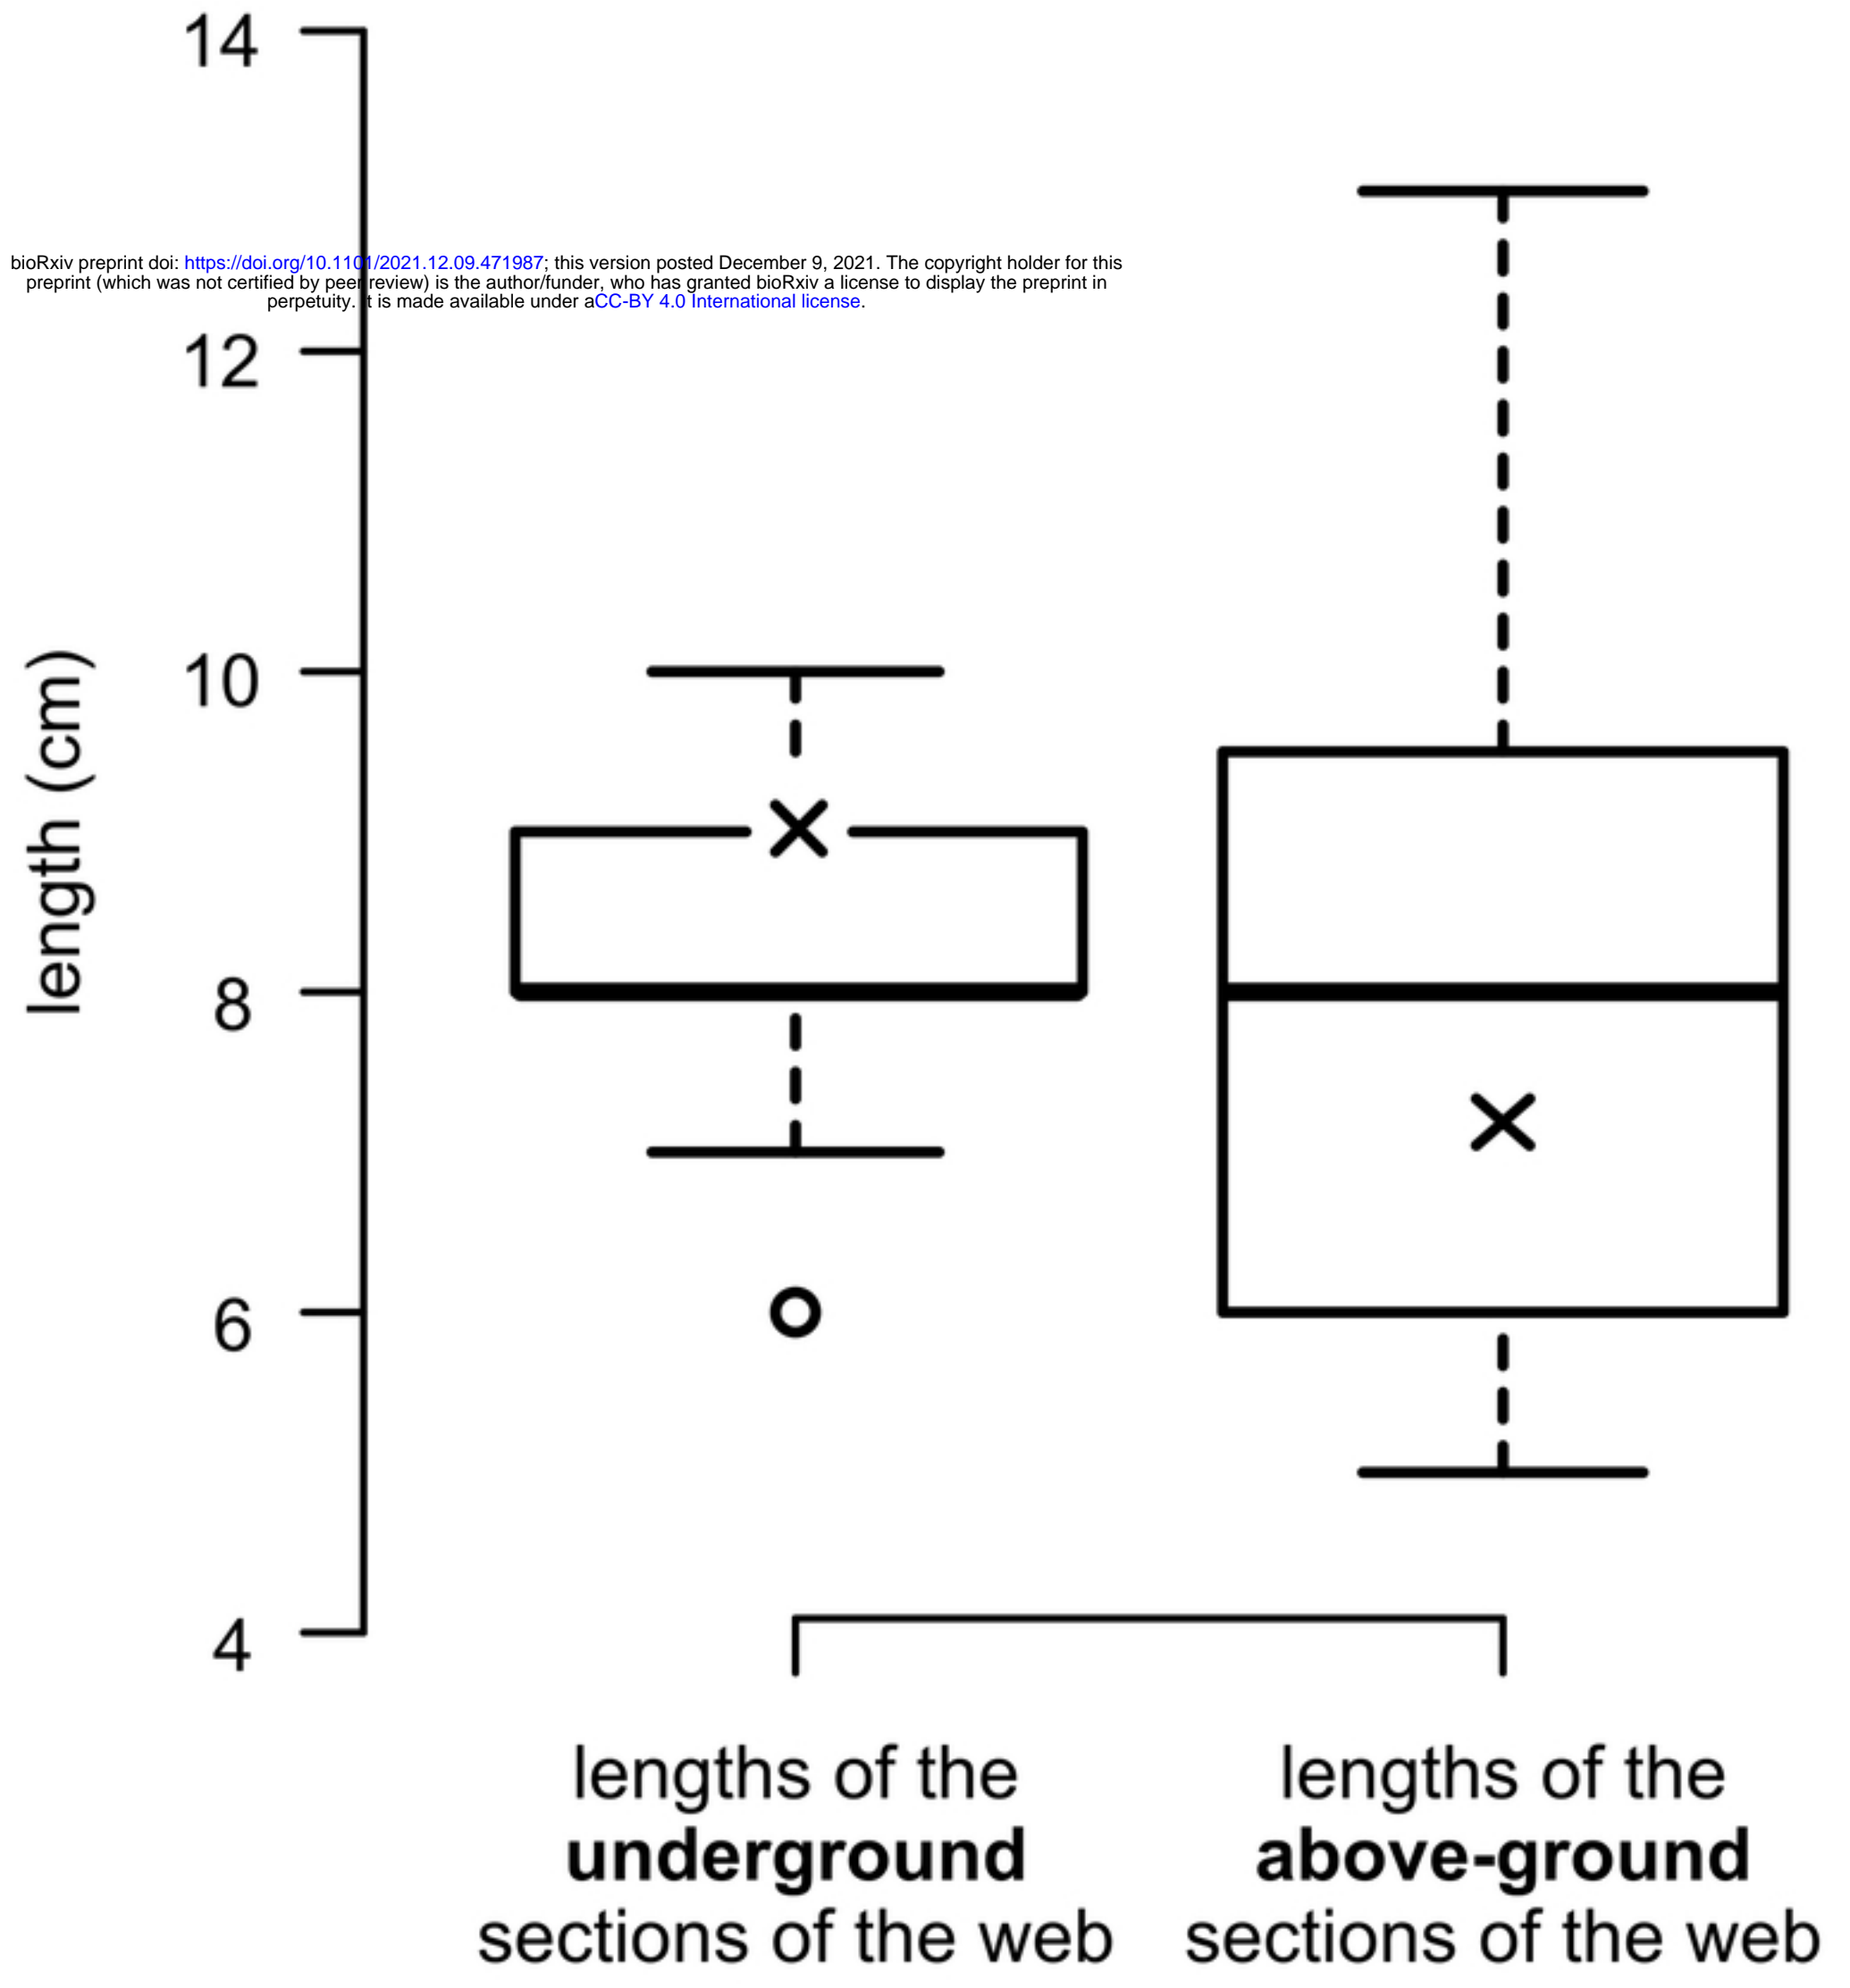

Figure4

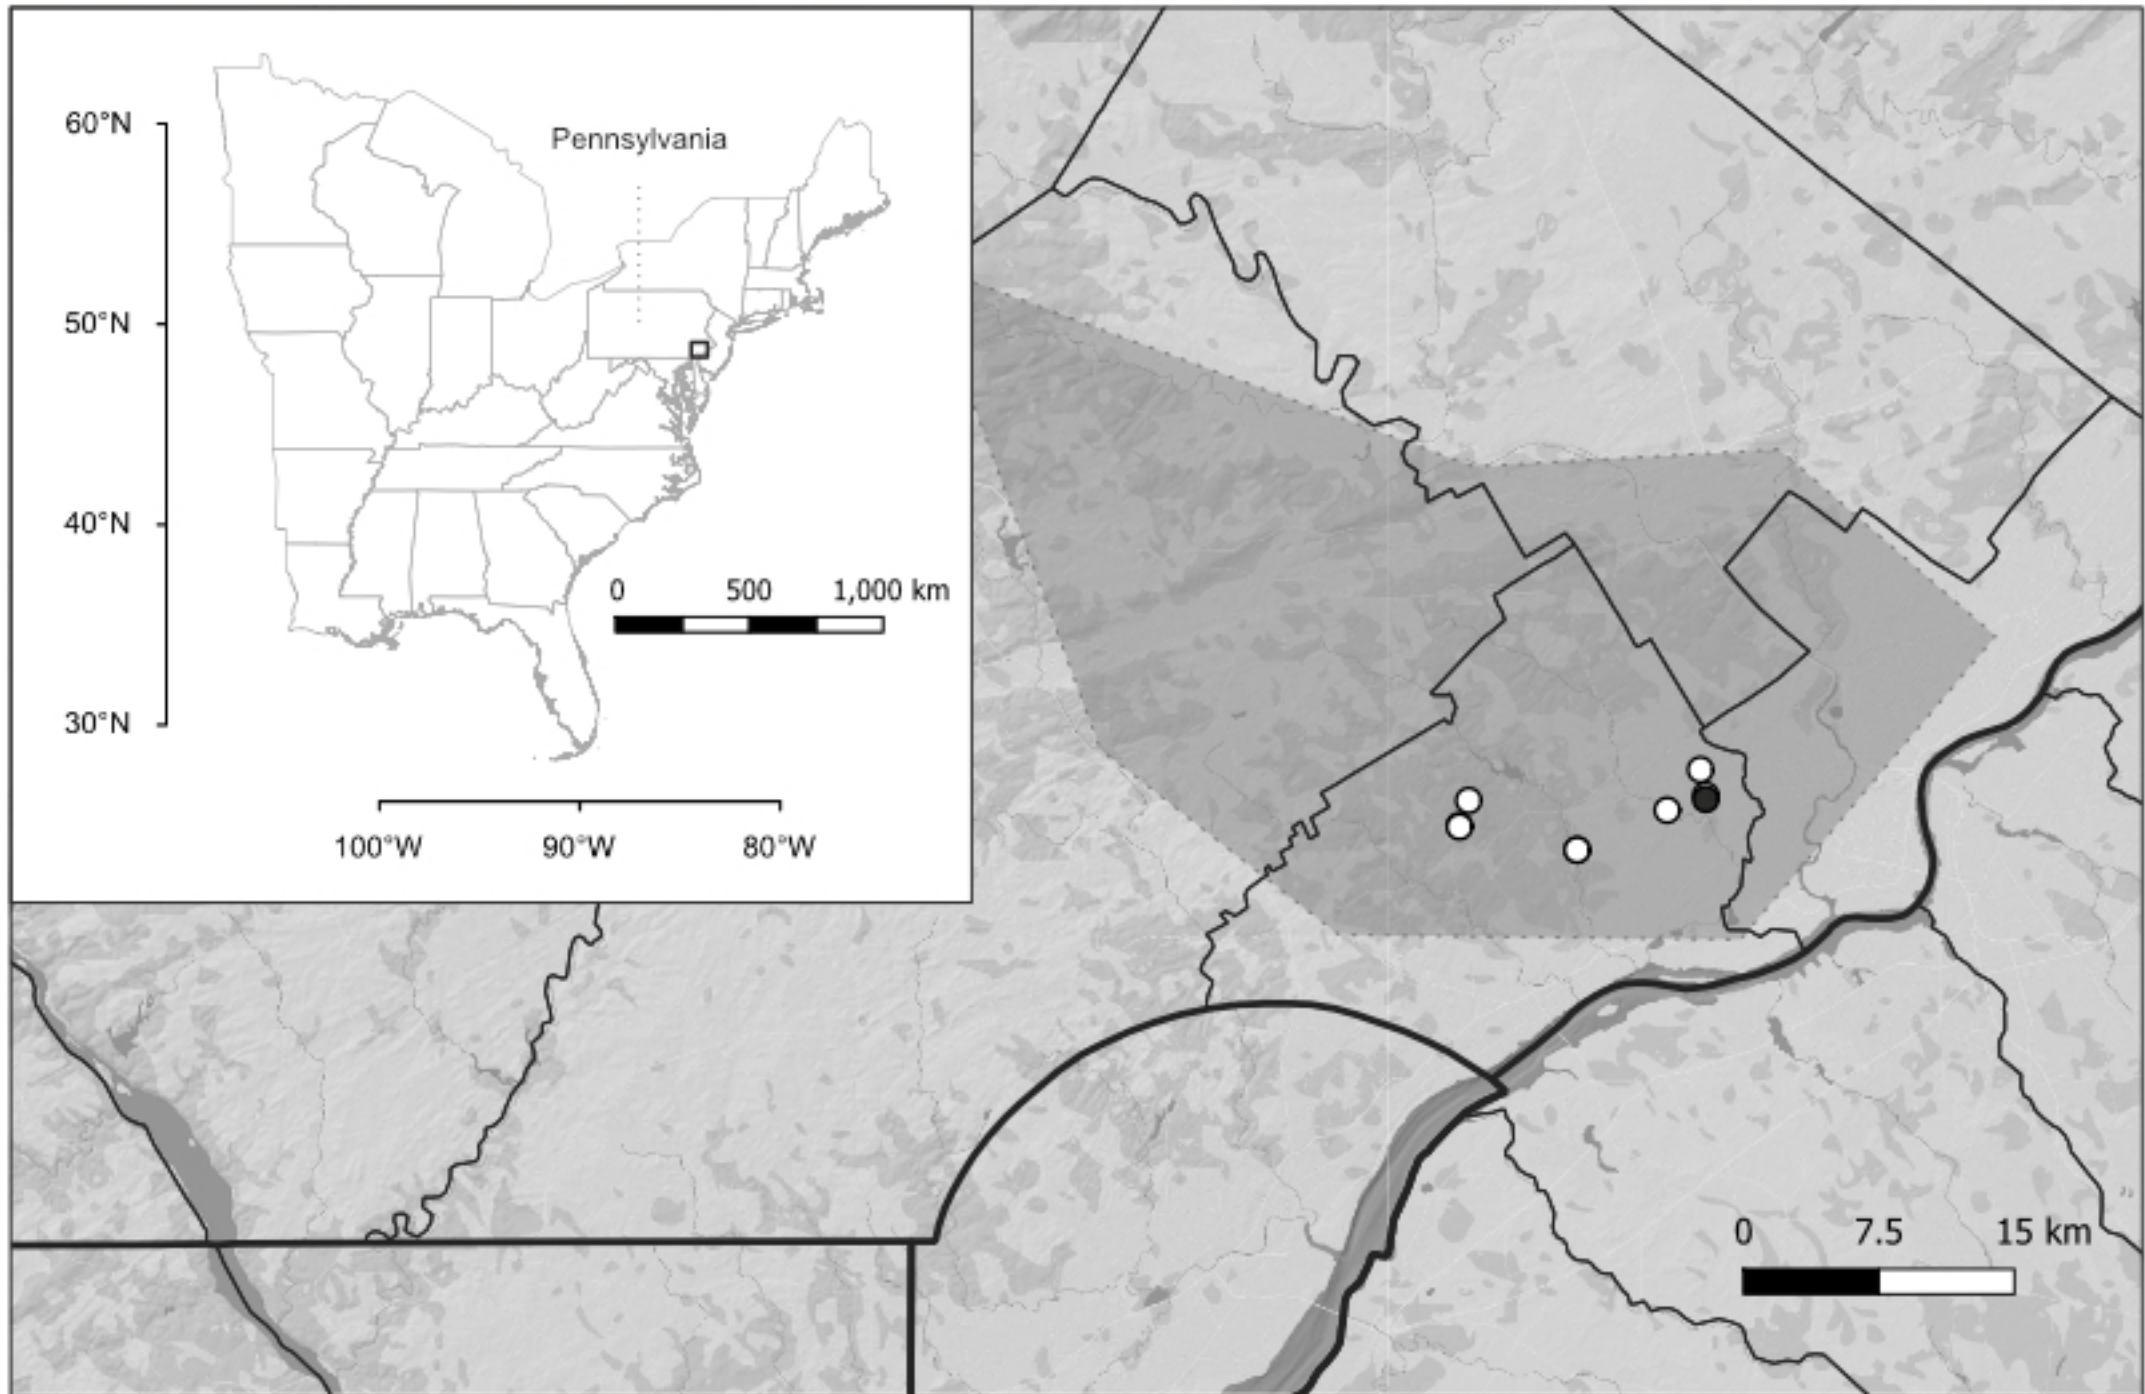

Figure3

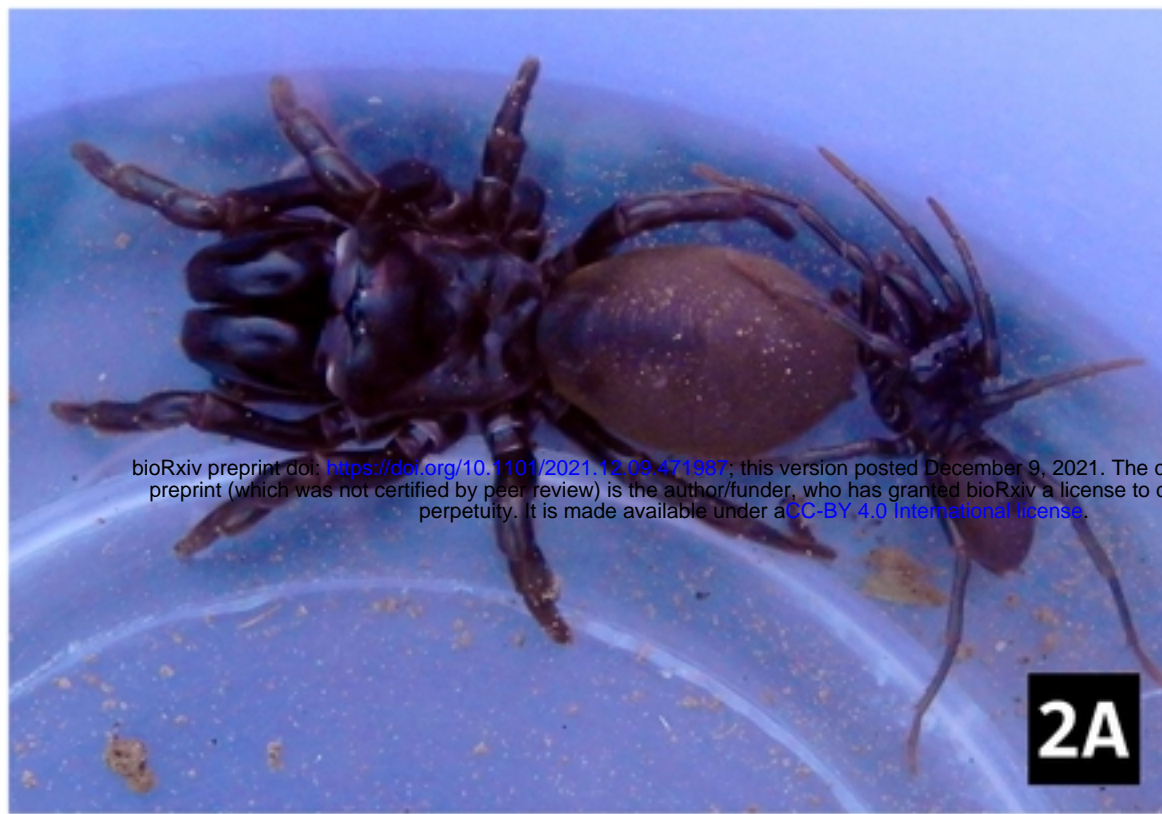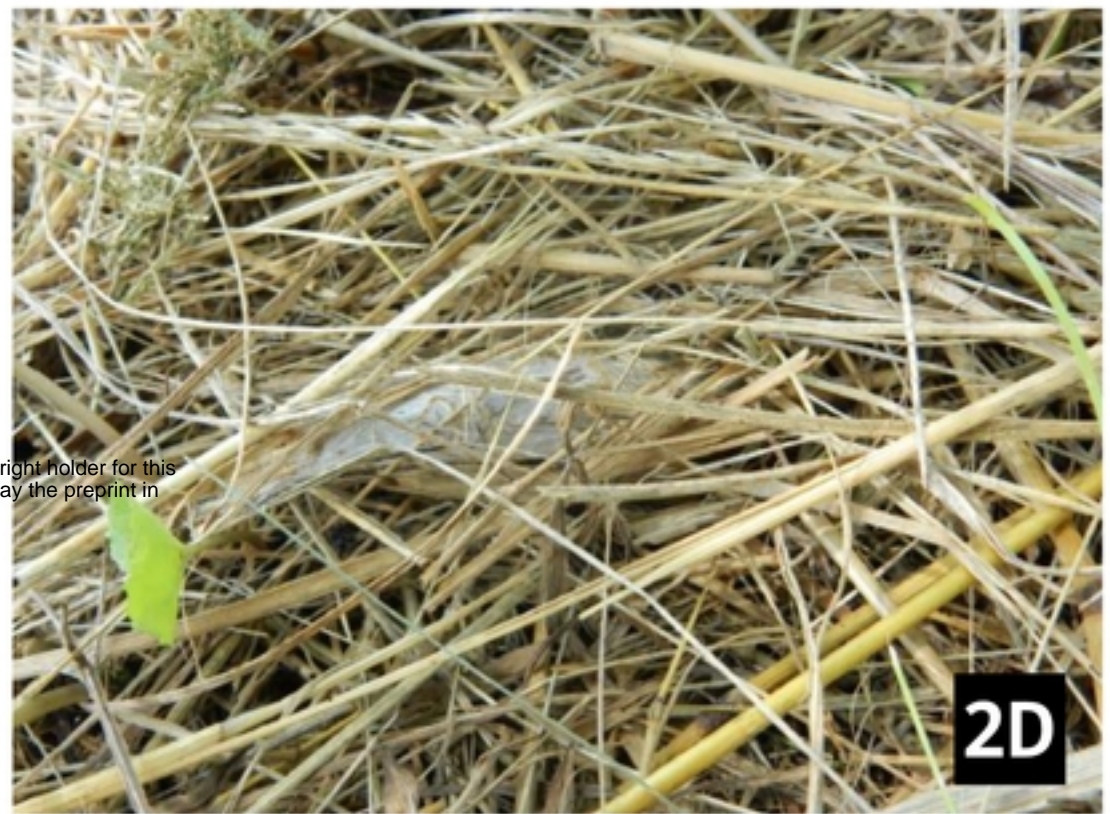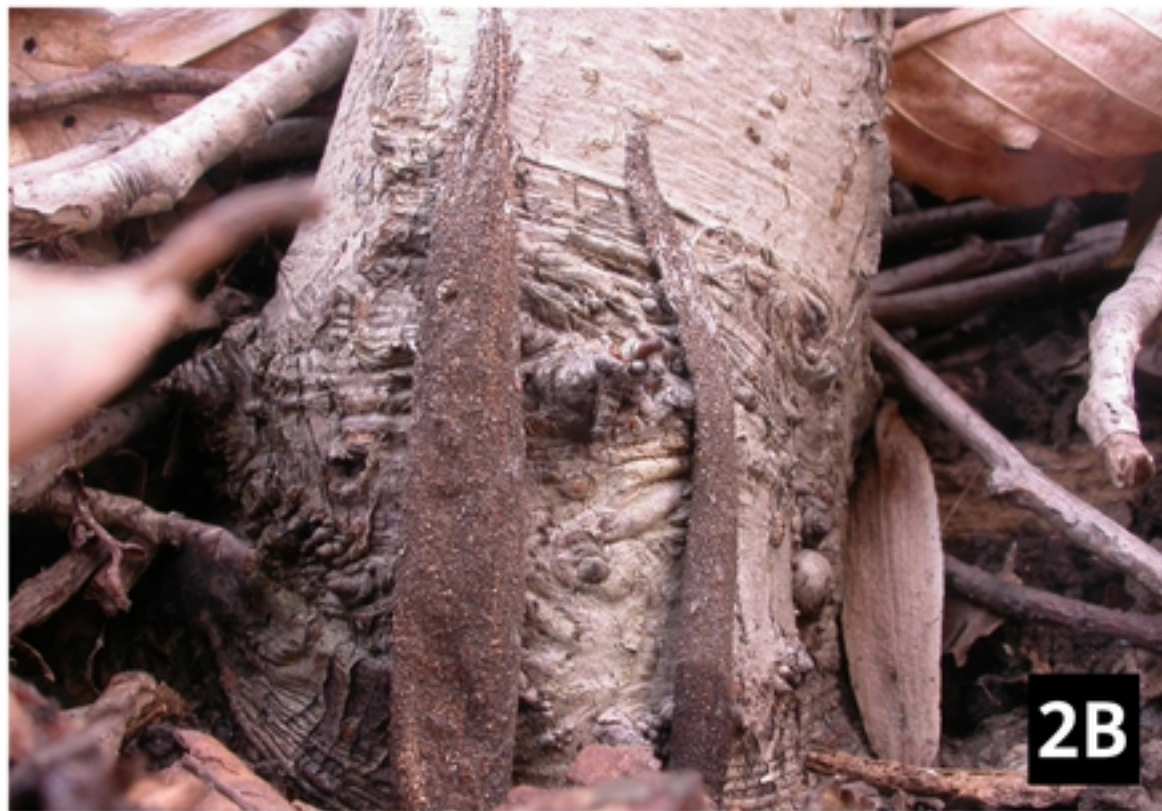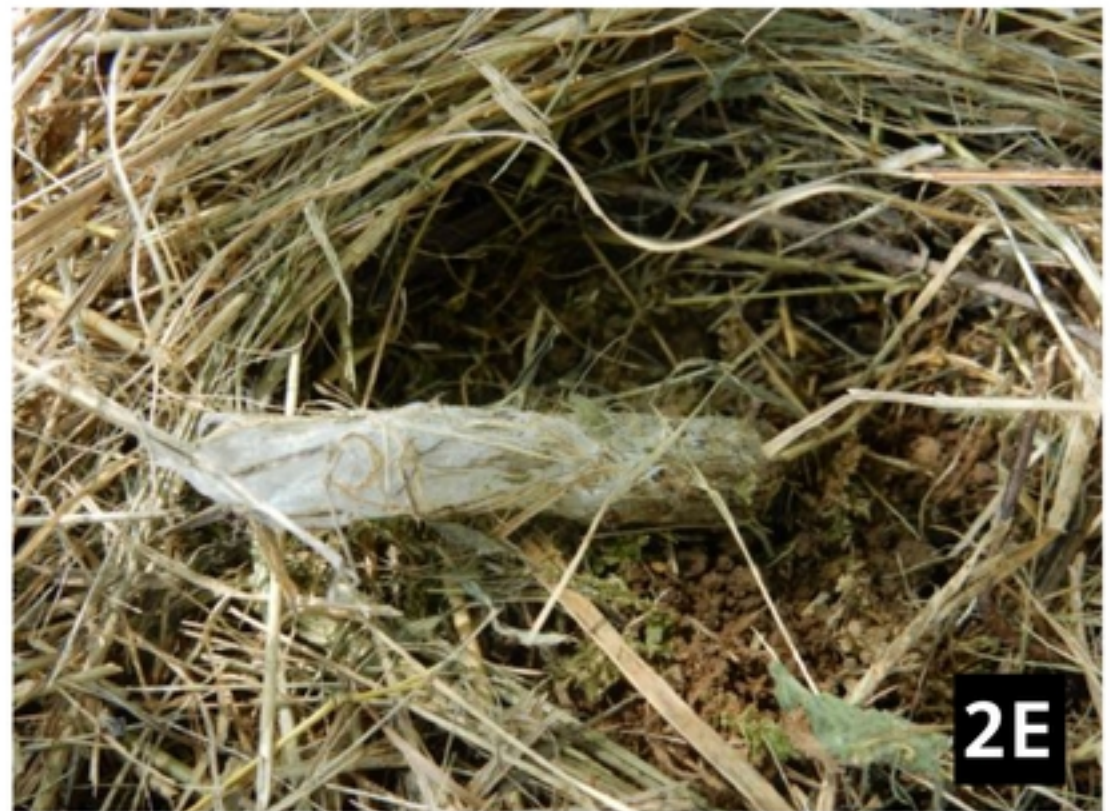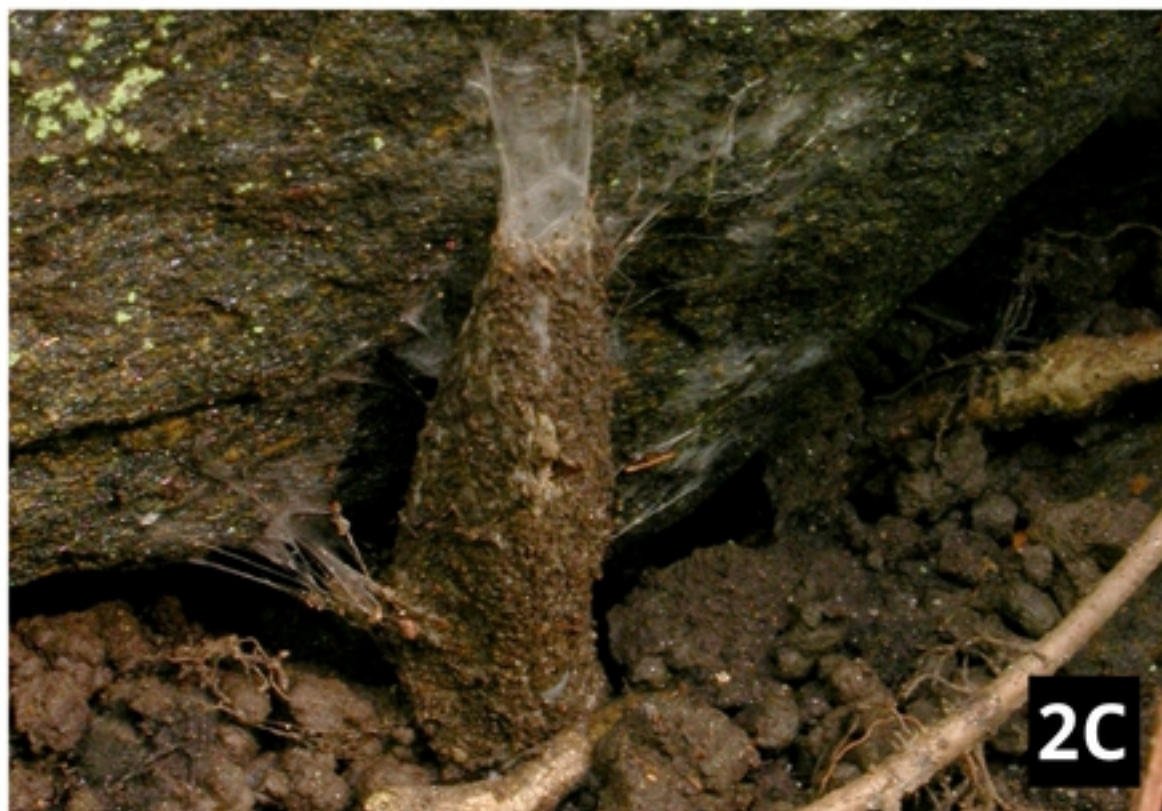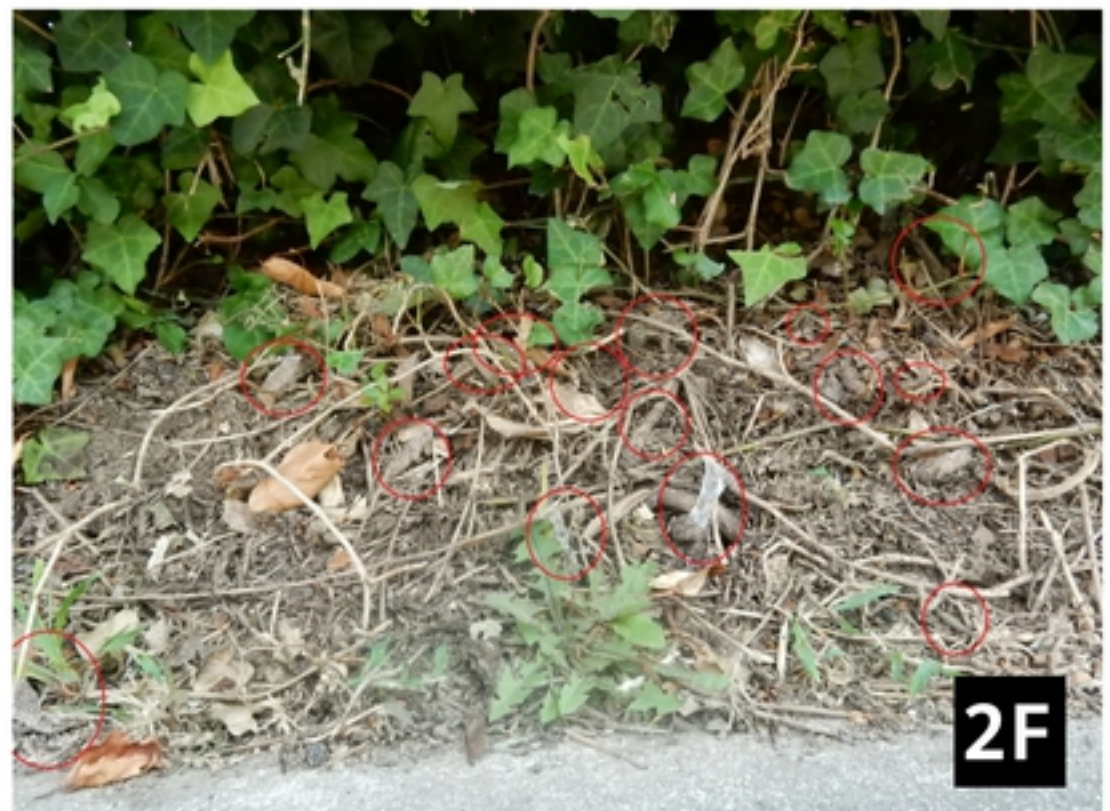

Figure 2

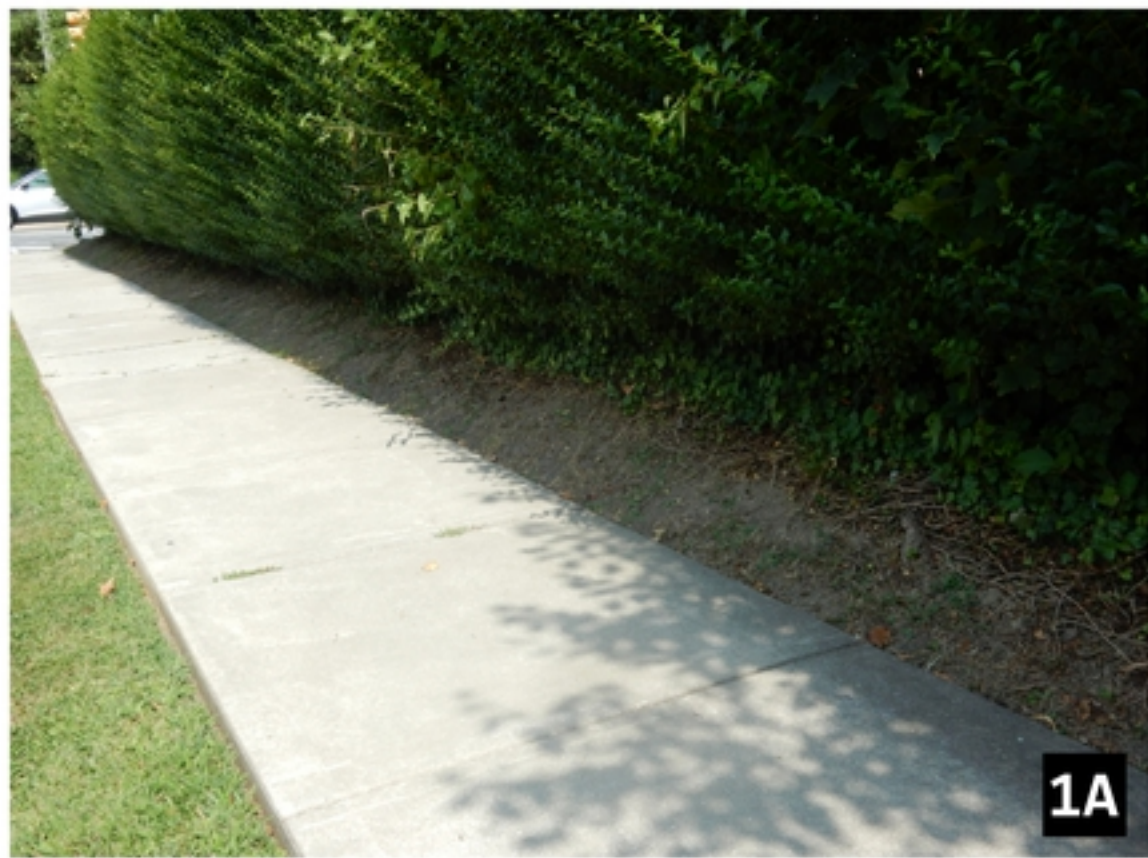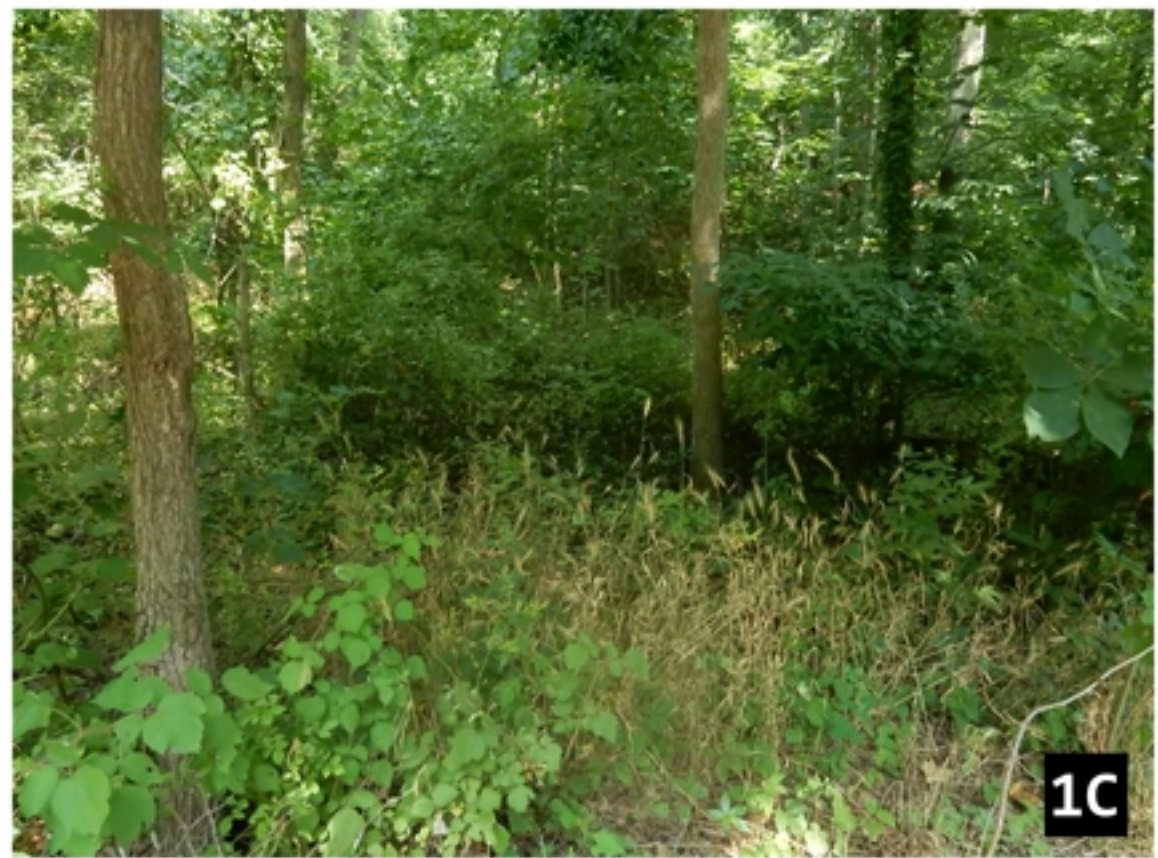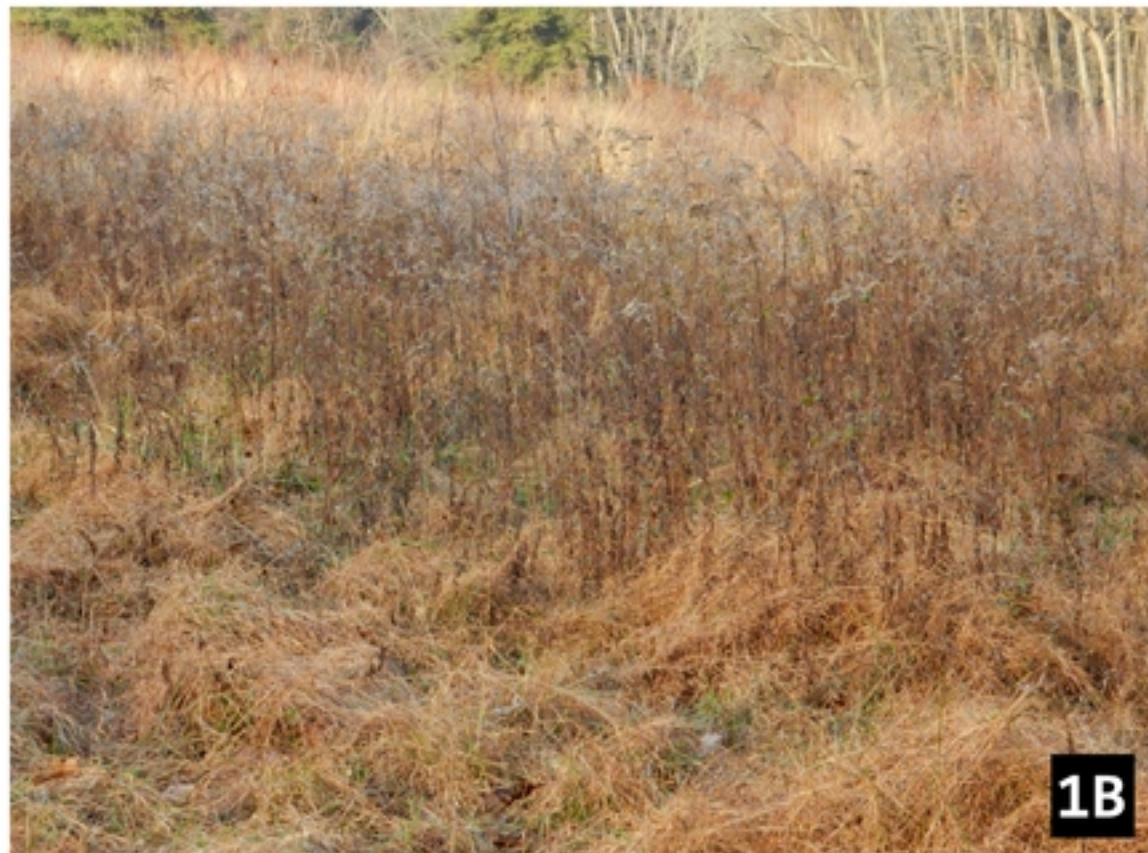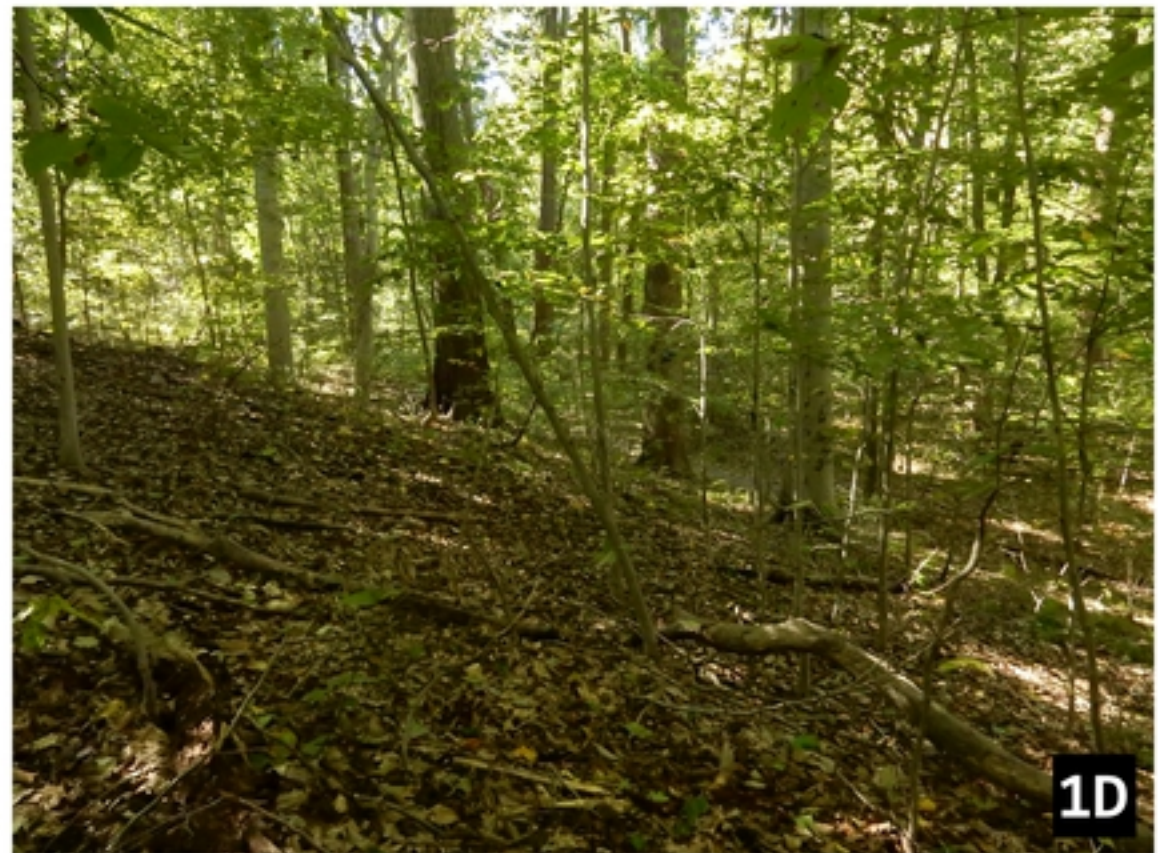

Figure 1
